# Supplementary material for: Coupling the TKE-ACM2 Planetary Boundary Layer Scheme with the Building Effect Parameterization Model
Source: Copernicus journal article supplement (doi:10.5194/gmd-2024-205), 2024-12-19
Supplement: Supplementary file 1 [file gmd-2024-205-supplement.pdf]

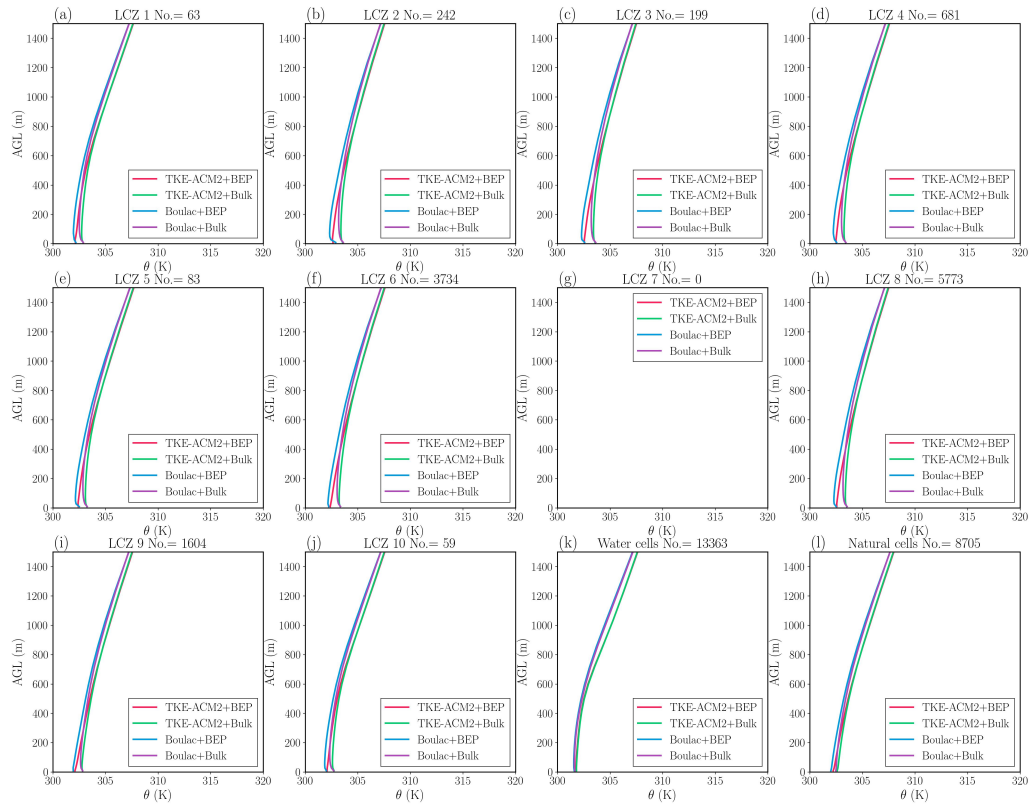

Figure S-1 Monthly averaged  $\theta$  vertical profile at aggregated LCZ grids

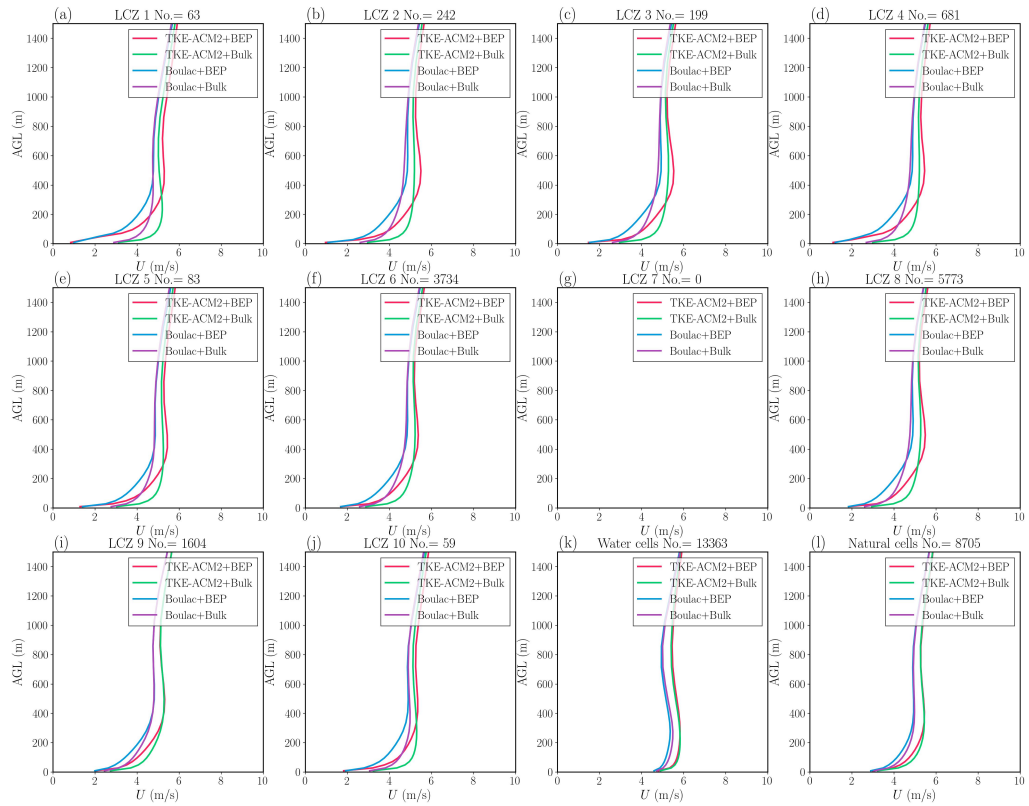

Figure S-2 Monthly averaged SUS vertical profile at aggregated LCZ grids



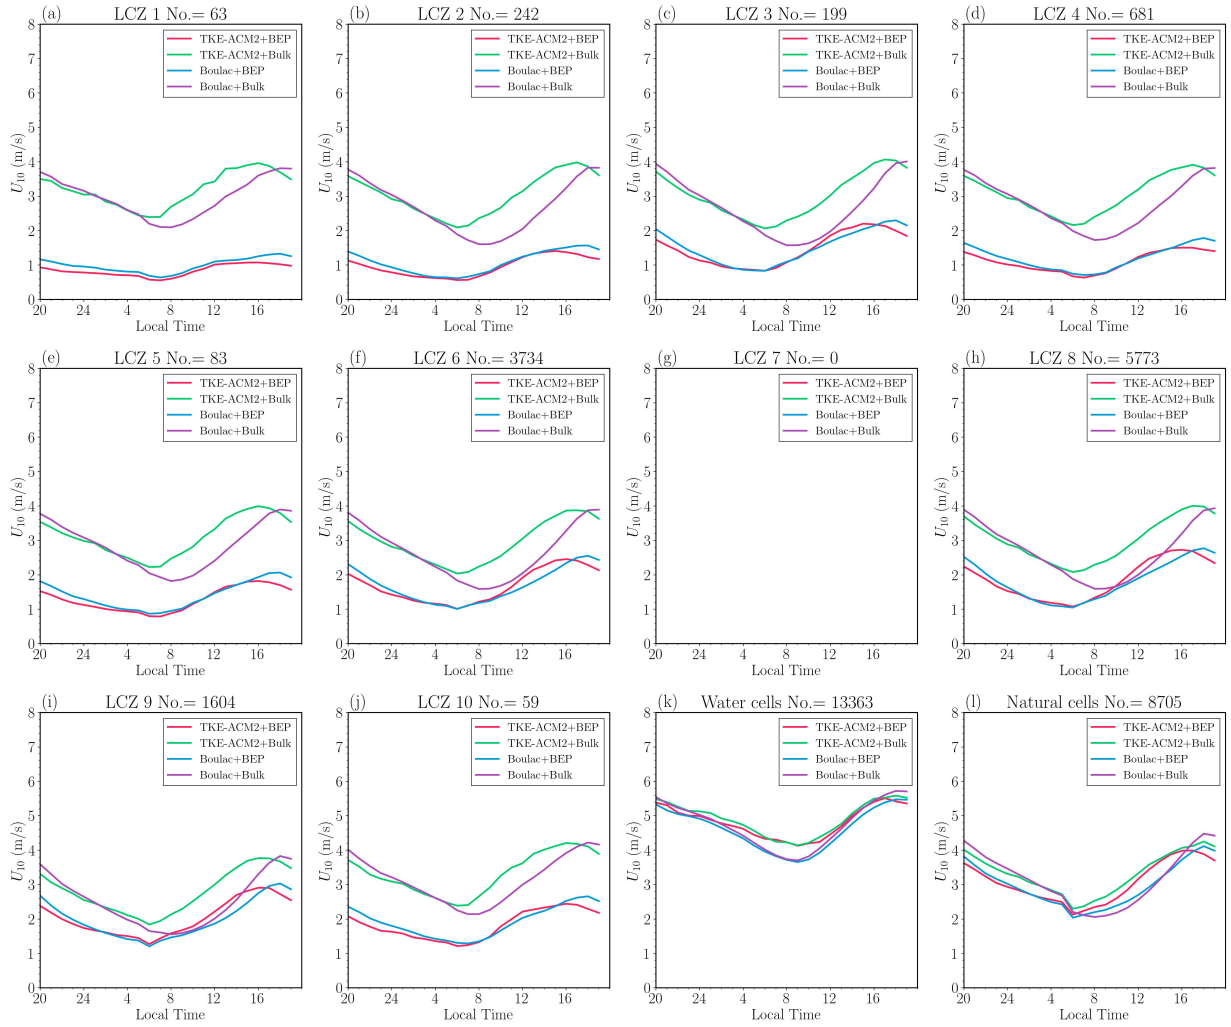

Figure S-3 Monthly averaged  $U_{10}$  diurnal cycle at aggregated LCZ grids

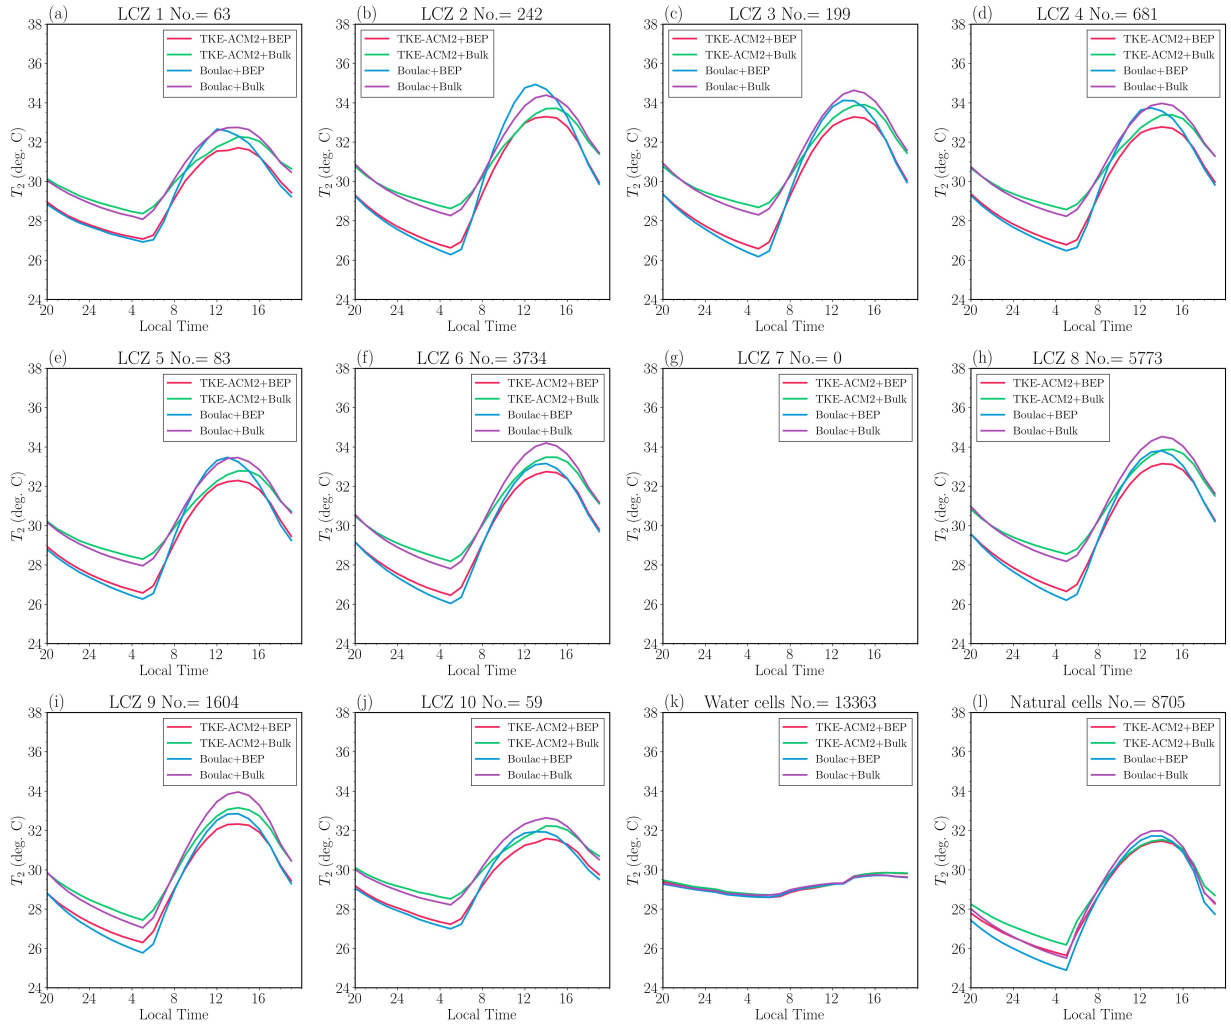

Figure S-4 Monthly averaged  $T_2$  diurnal cycle at aggregated LCZ grids

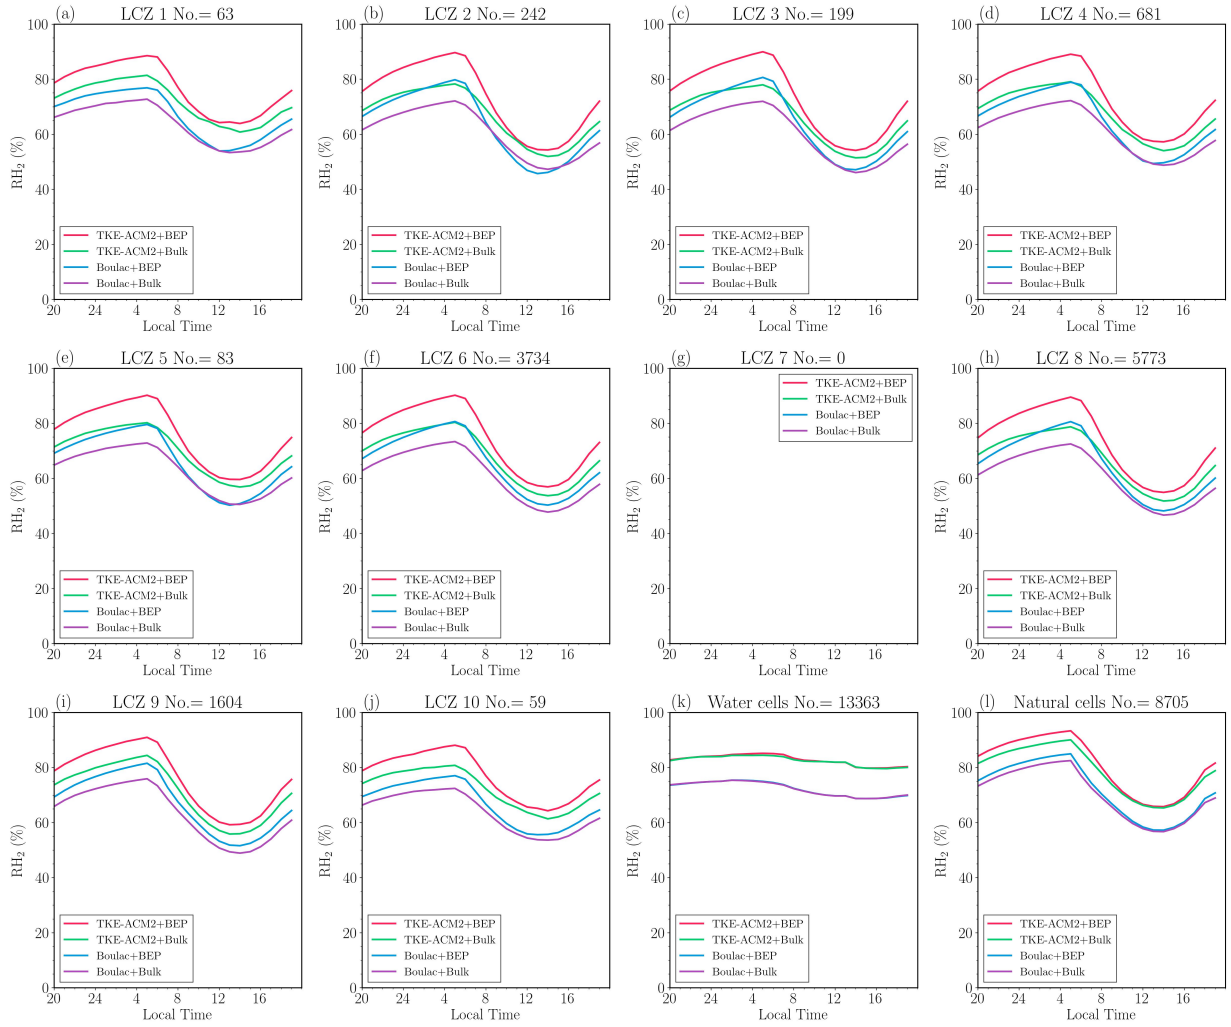

Figure S-5 Monthly averaged  $\mathrm{RH}_2$  diurnal cycle at aggregated LCZ grids

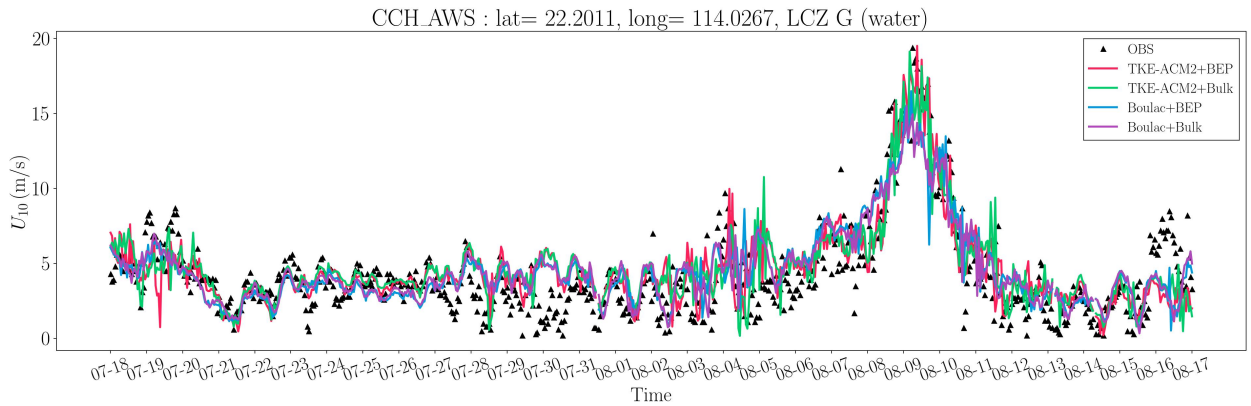

Figure S-6:  $SU_{10}$  at CCH\_AWS station.

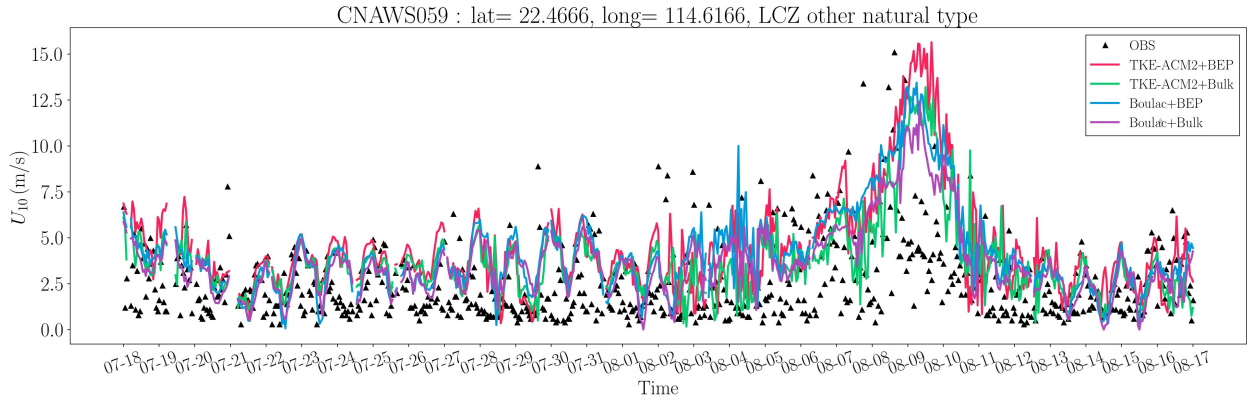

Figure S-7:  $U_{10}$  at CNAWS059 station.

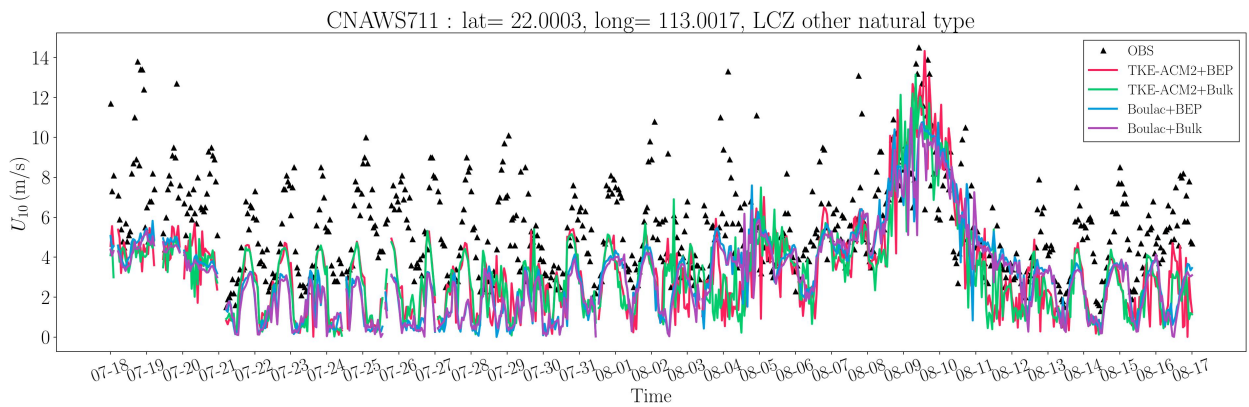

Figure S-8:  $U_{10}$  at CNAWS711 station.

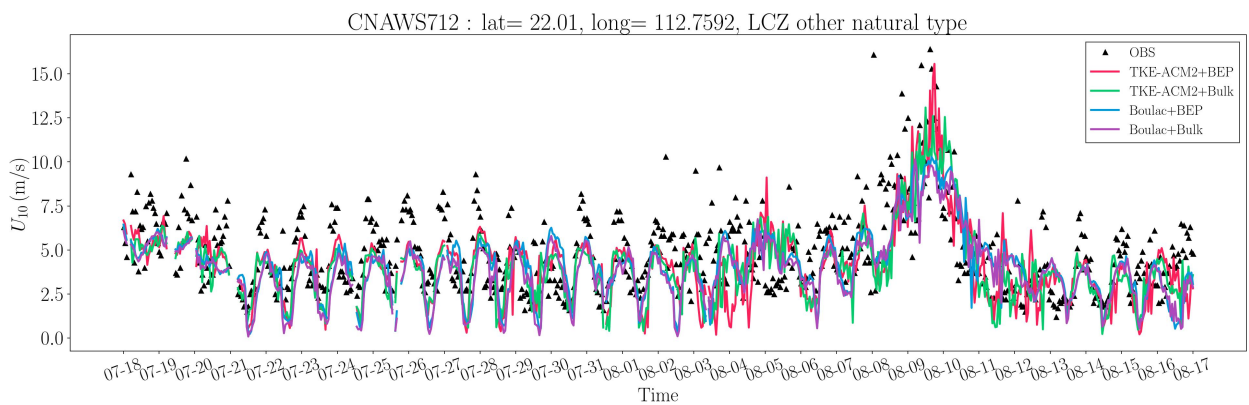

Figure S-9:  $U_{10}$  at CNAWS712 station.

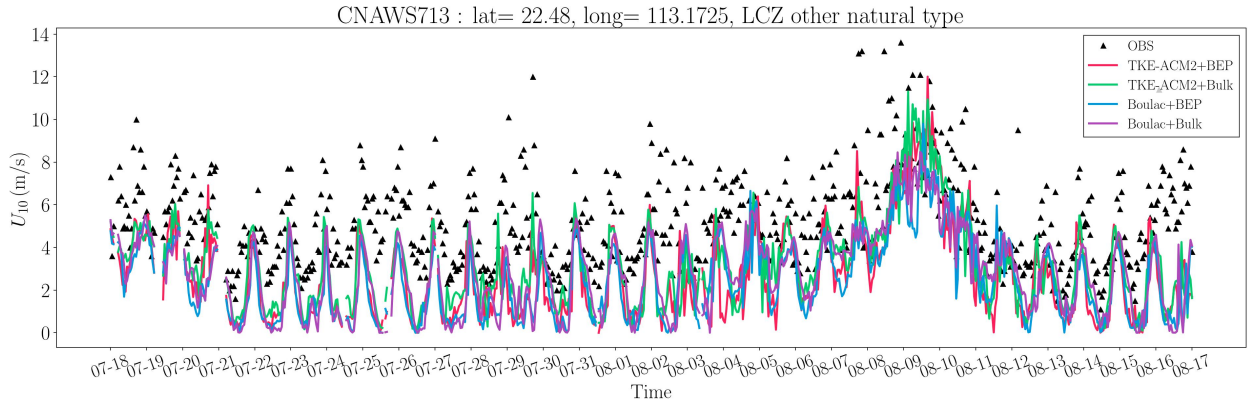

Figure S-10:  $U_{10}$  at CNAWS713 station.

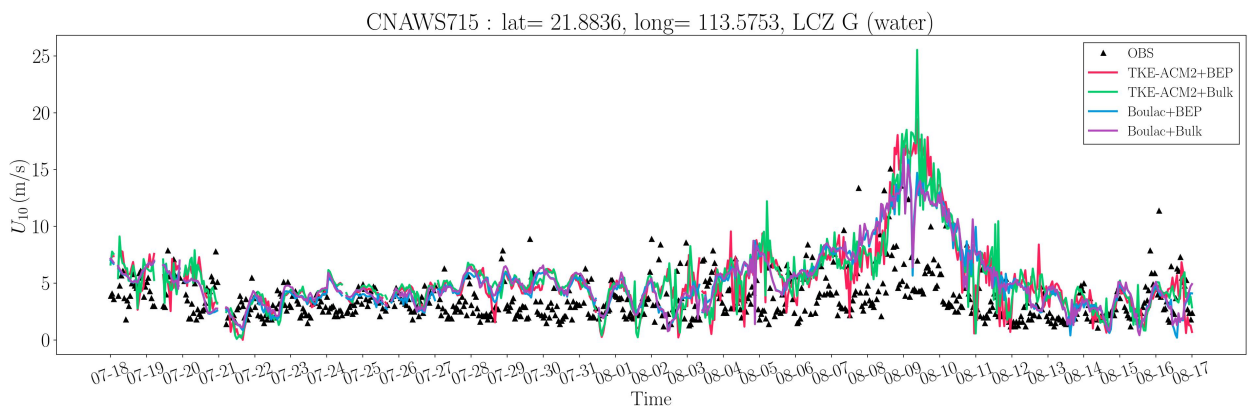

Figure S-11:  $U_{10}$  at CNAWS715 station.

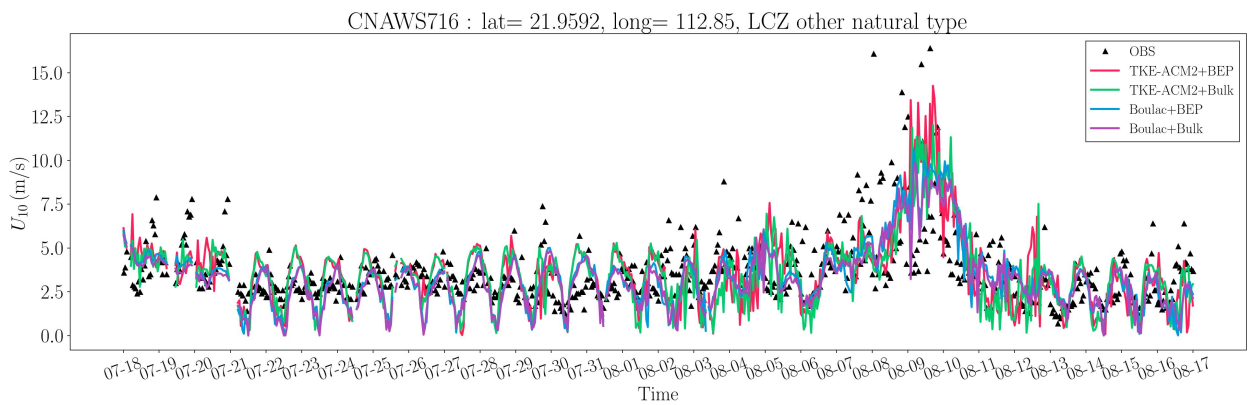

Figure S-12:  $U_{10}$  at CNAWS716 station.



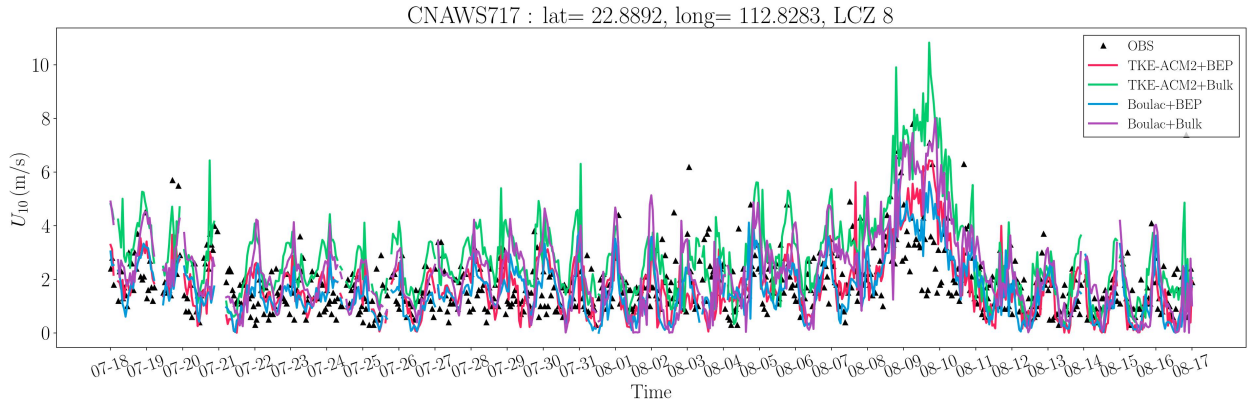

Figure S-13:  $U_{10}$  at CNAWS717 station.

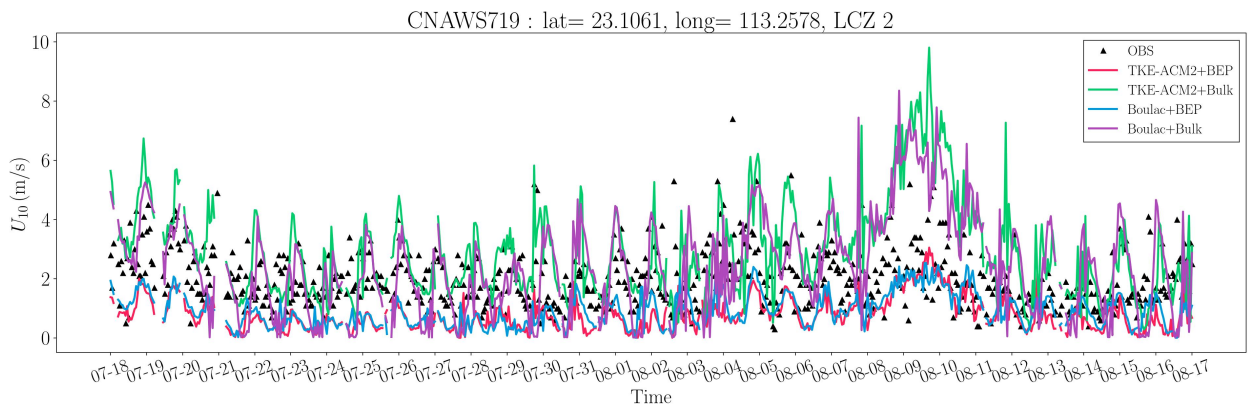

Figure S-14:  $U_{10}$  at CNAWS719 station.

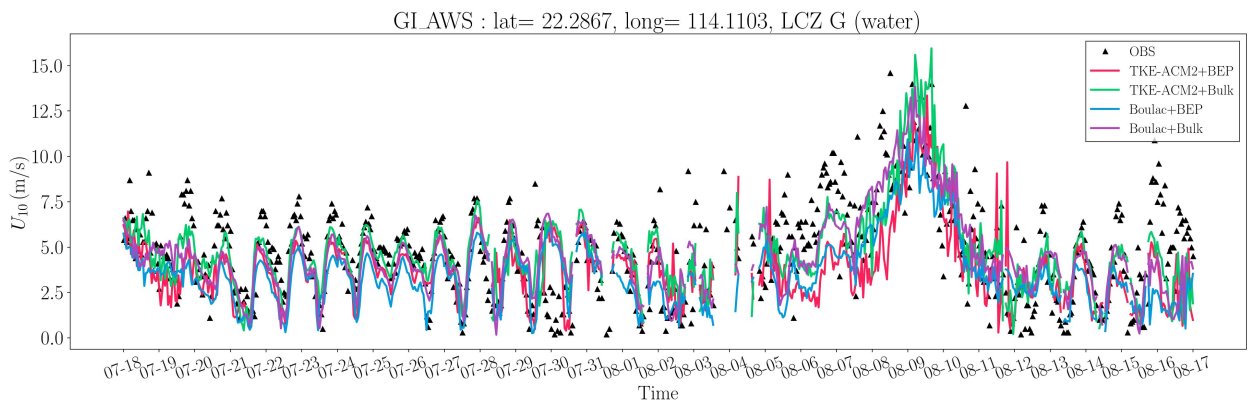

Figure S-15:  $U_{10}$  at GI\_AWS station.

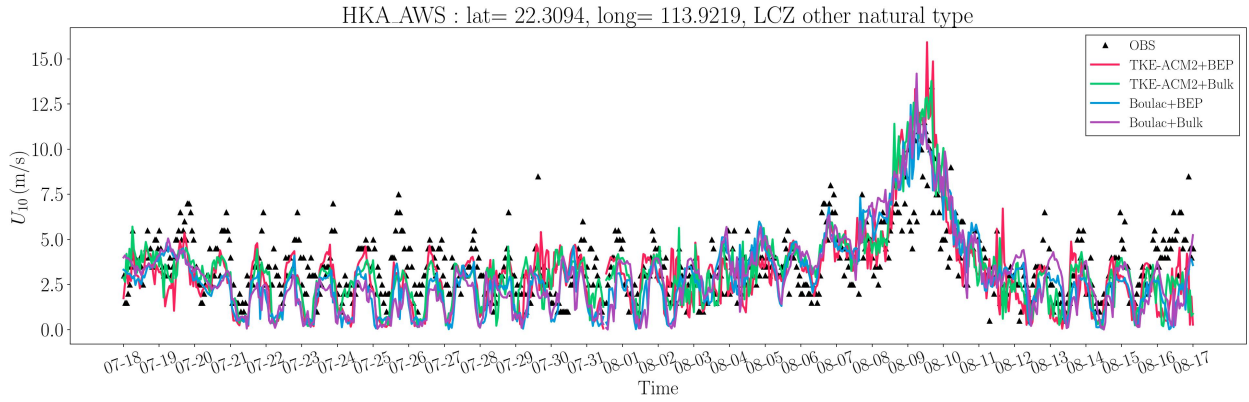

Figure S-16:  $U_{10}$  at HKA\_AWS station.

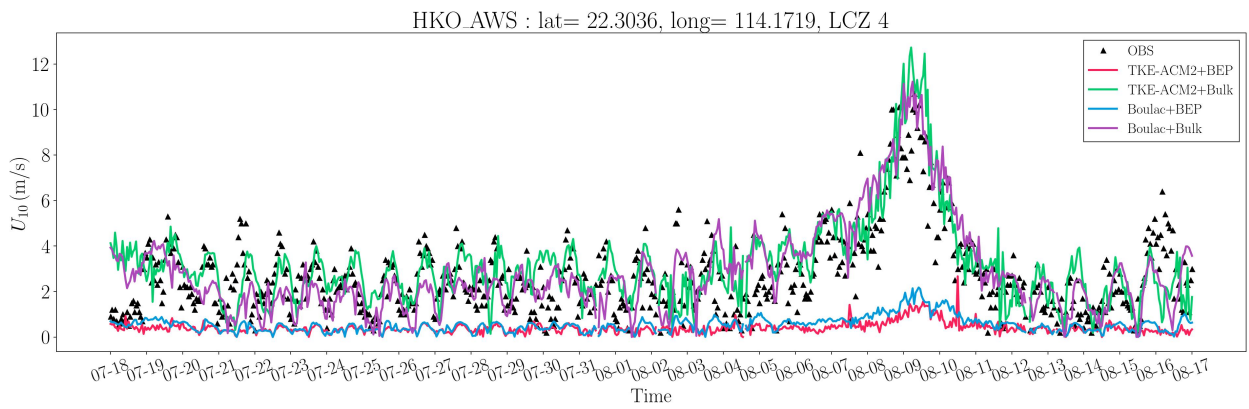

Figure S-17:  $U_{10}$  at HKO\_AWS station.

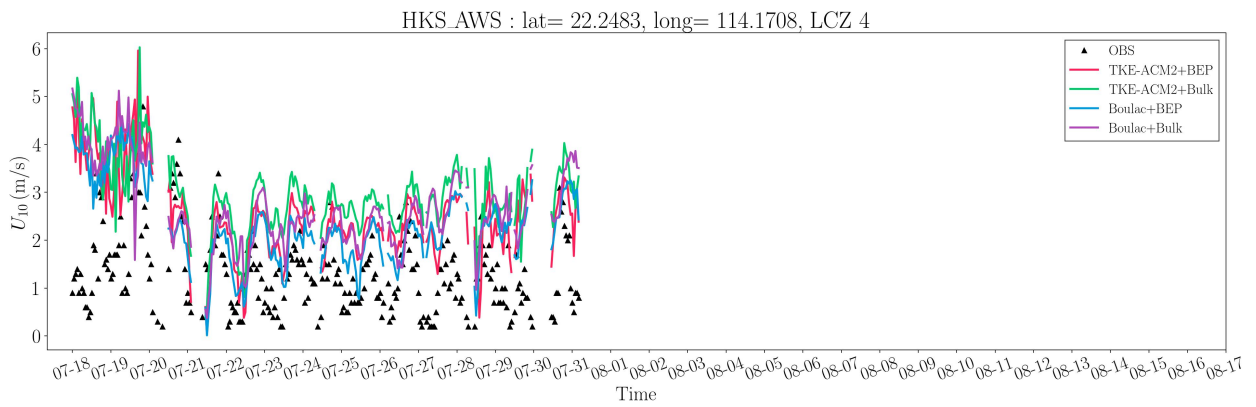

Figure S-18:  $U_{10}$  at HKS\_AWS station.

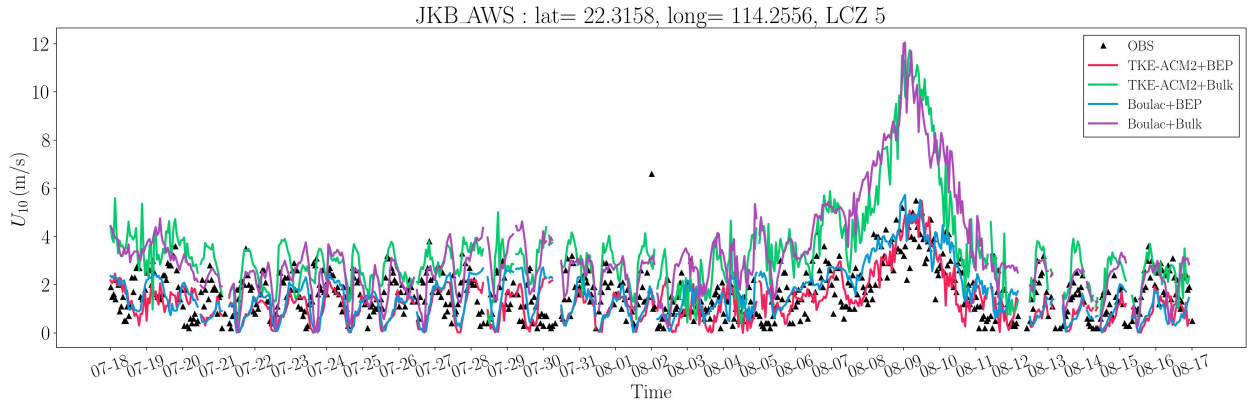

Figure S-19:  $U_{10}$  at JKB\_AWS station.

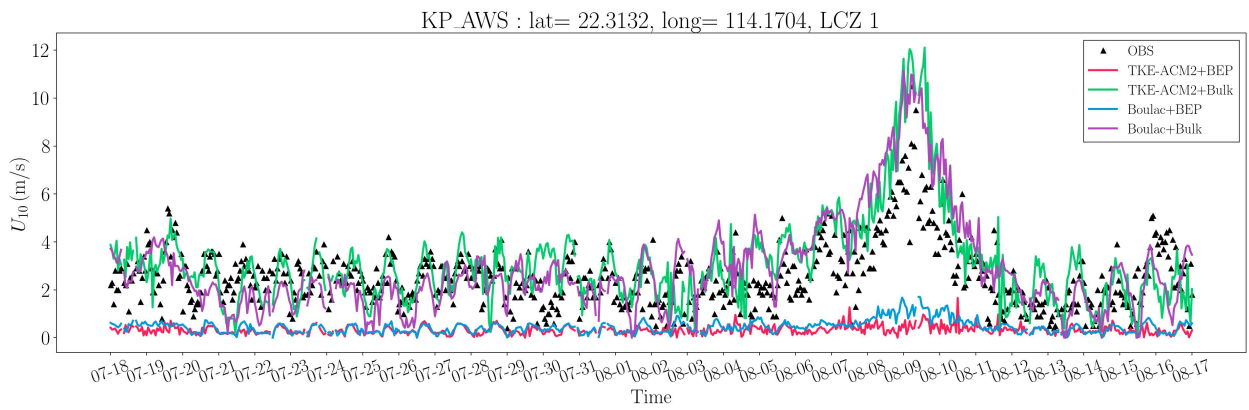

Figure S-20:  $U_{10}$  at KP\_AWS station.

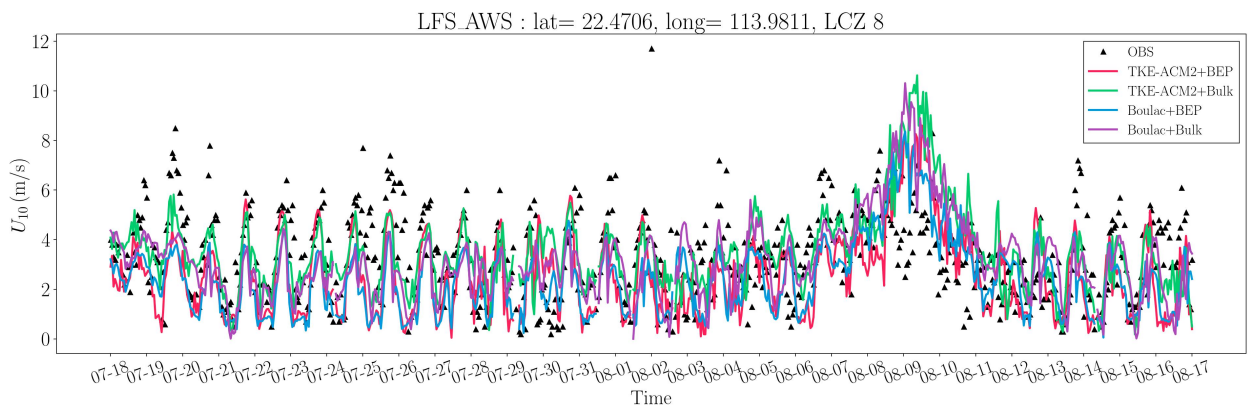

Figure S-21:  $U_{10}$  at LFS\_AWS station.



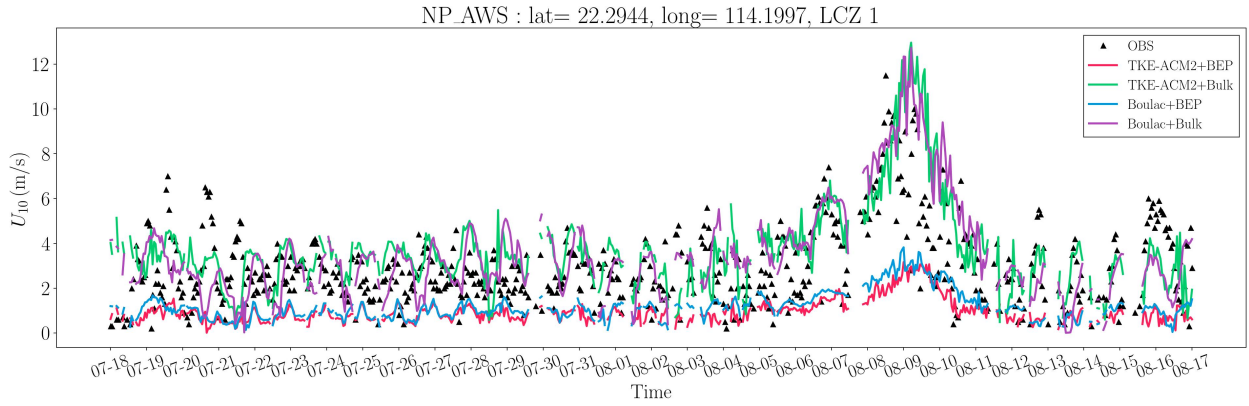

Figure S-22:  $U_{10}$  at NP\_AWS station.

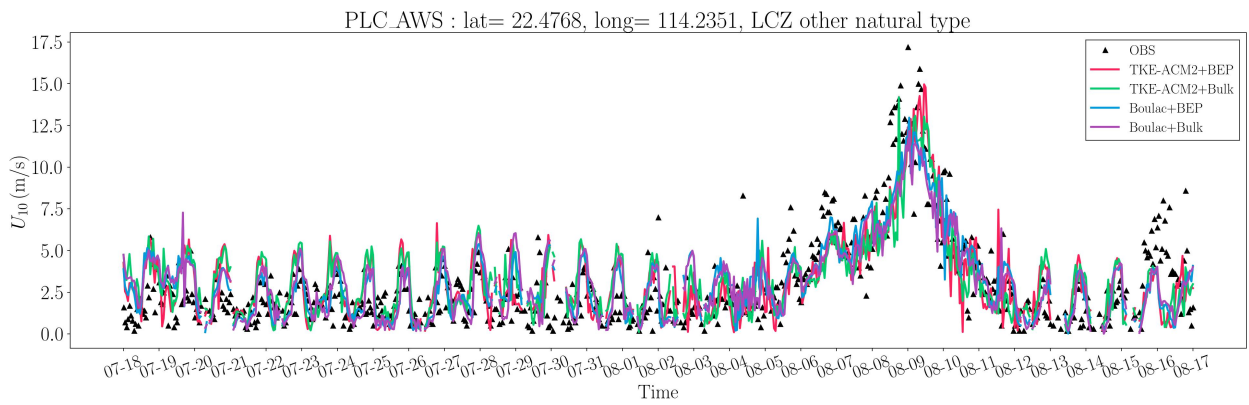

Figure S-23:  $U_{10}$  at PLC\_AWS station.

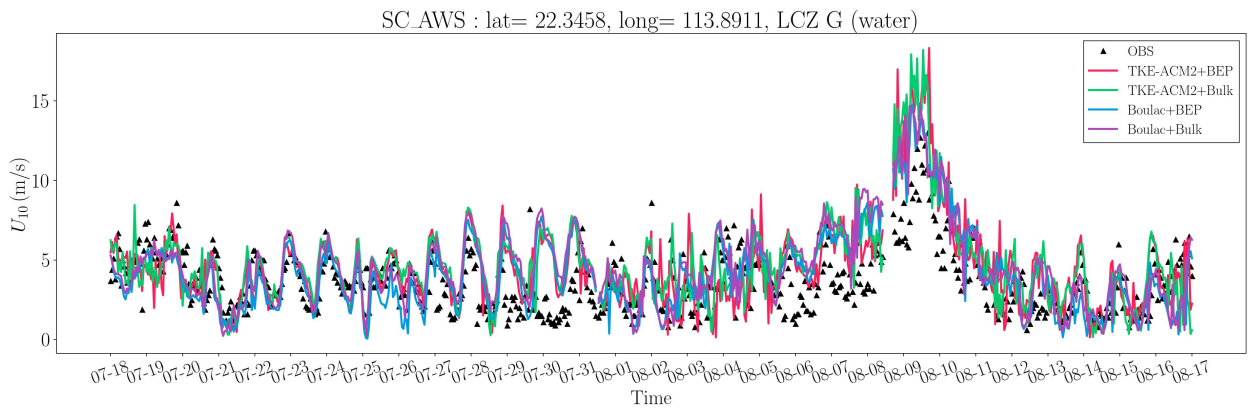

Figure S-24:  $U_{10}$  at SC\_AWS station.

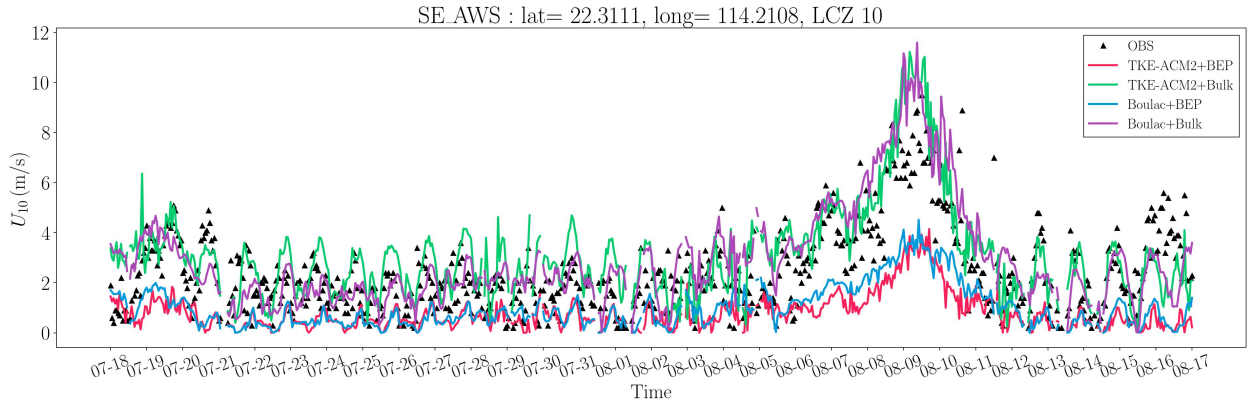

Figure S-25:  $U_{10}$  at SE\_AWS station.

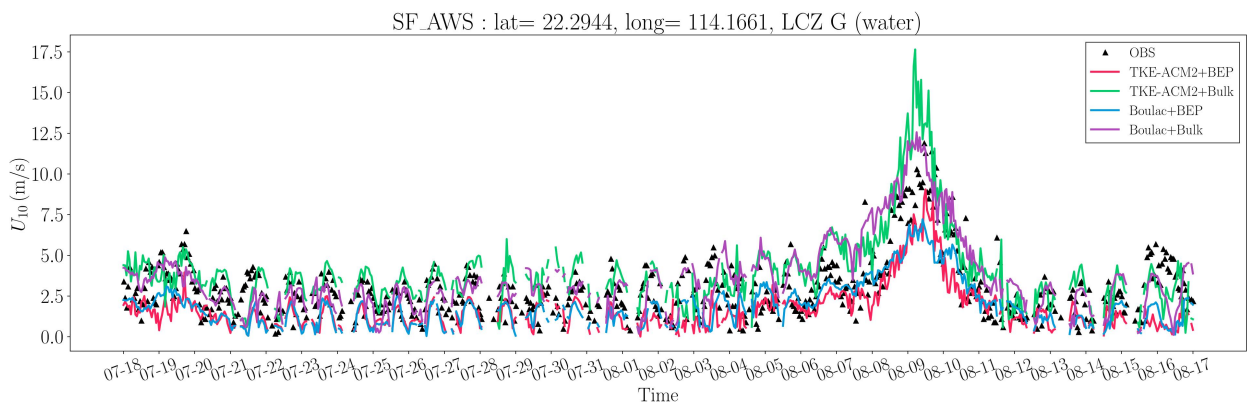

Figure S-26:  $U_{10}$  at SF\_AWS station.

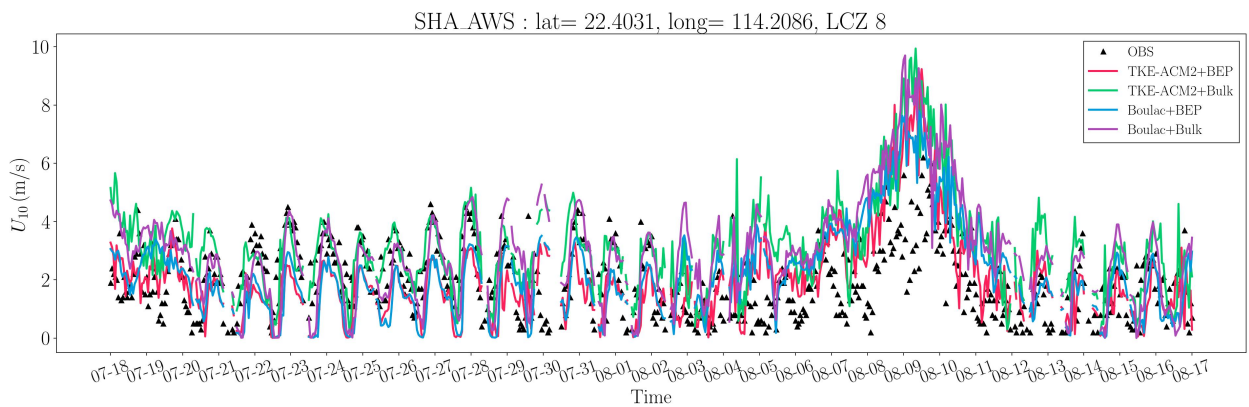

Figure S-27:  $U_{10}$  at SHA\_AWS station.

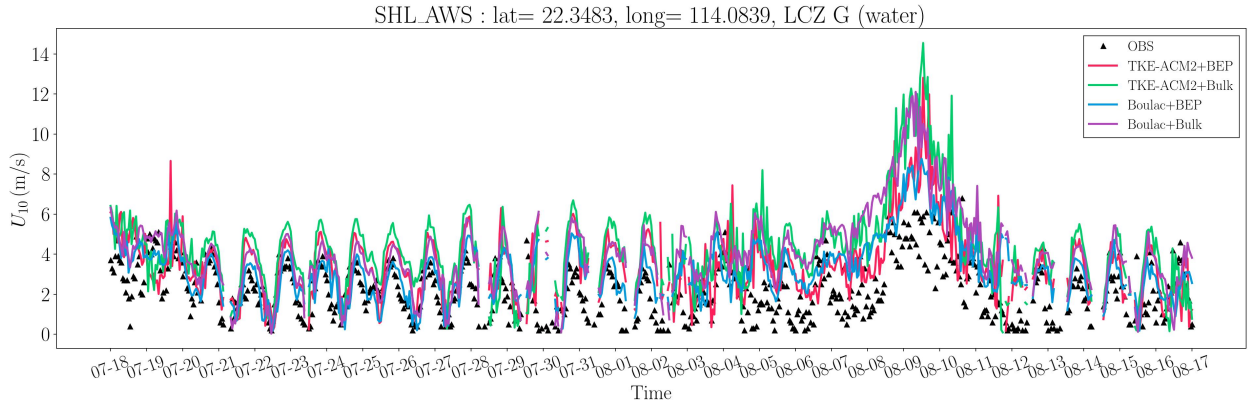

Figure S-28:  $U_{10}$  at SHL\_AWS station.

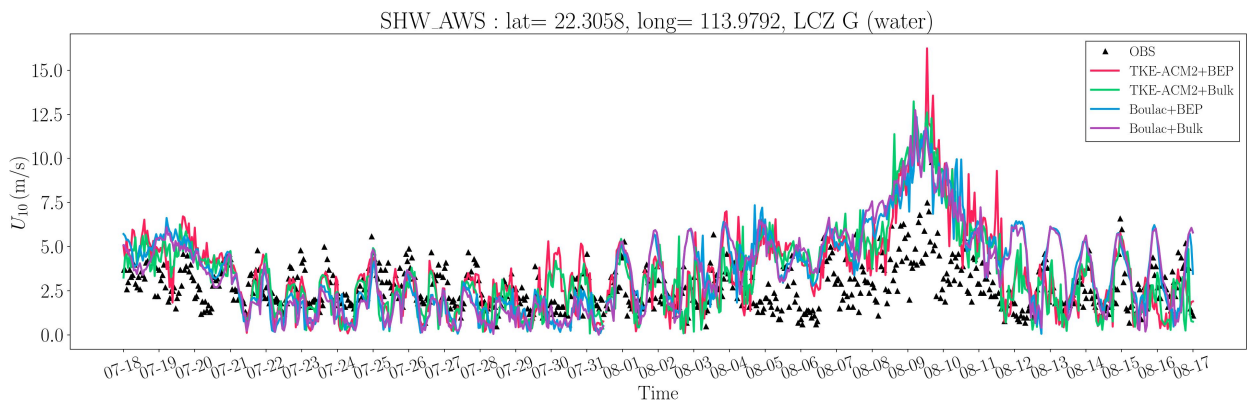

Figure S-29:  $U_{10}$  at SHW\_AWS station.

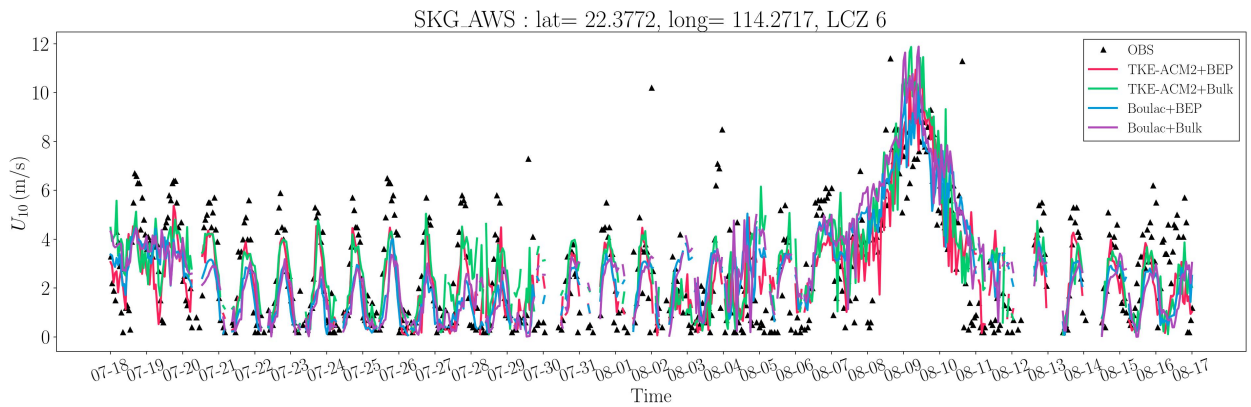

Figure S-30:  $U_{10}$  at SKG\_AWS station.

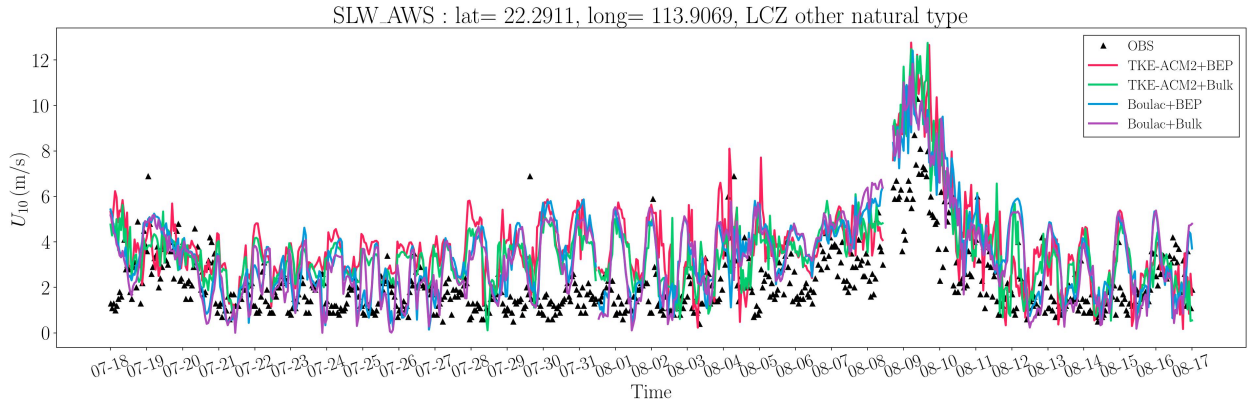

Figure S-31:  $U_{10}$  at SLW\_AWS station.

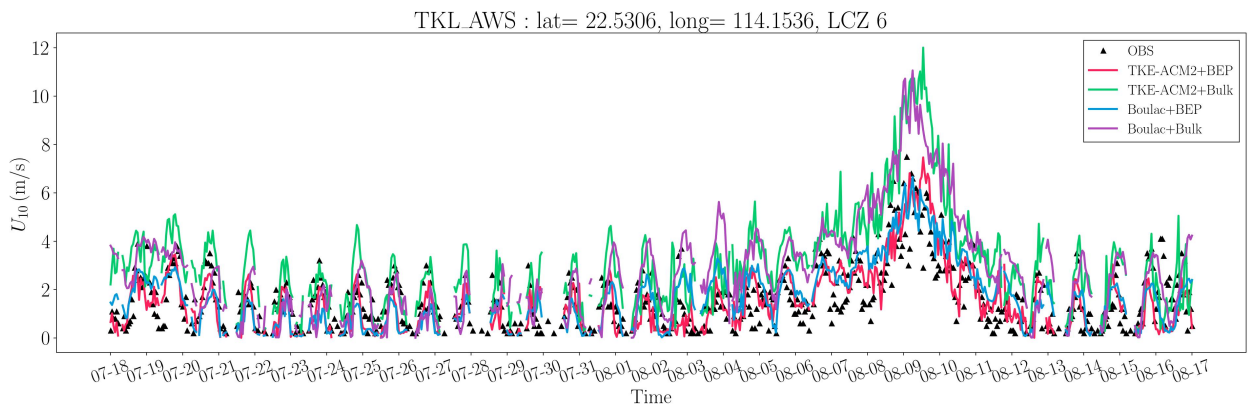

Figure S-32:  $U_{10}$  at TKL\_AWS station.

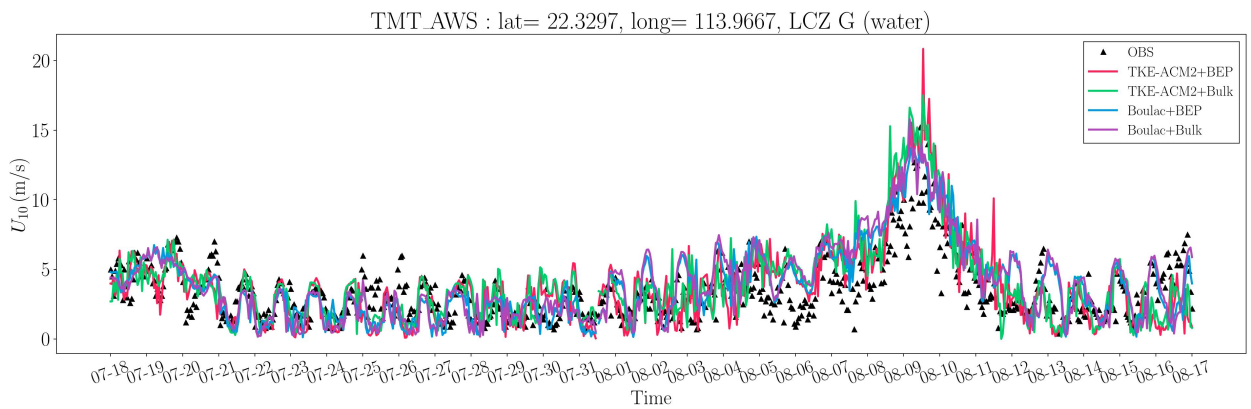

Figure S-33:  $U_{10}$  at TMT\_AWS station.



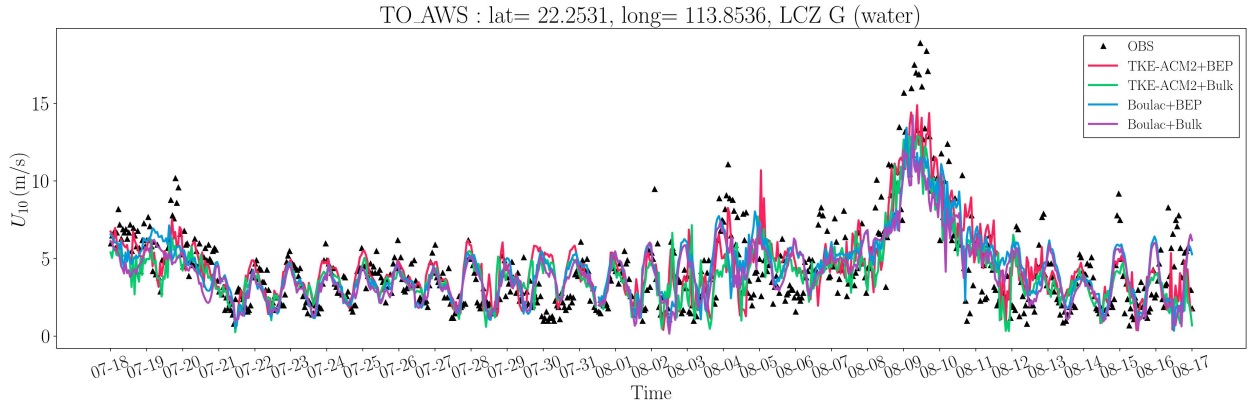

Figure S-34:  $U_{10}$  at TO\_AWS station.

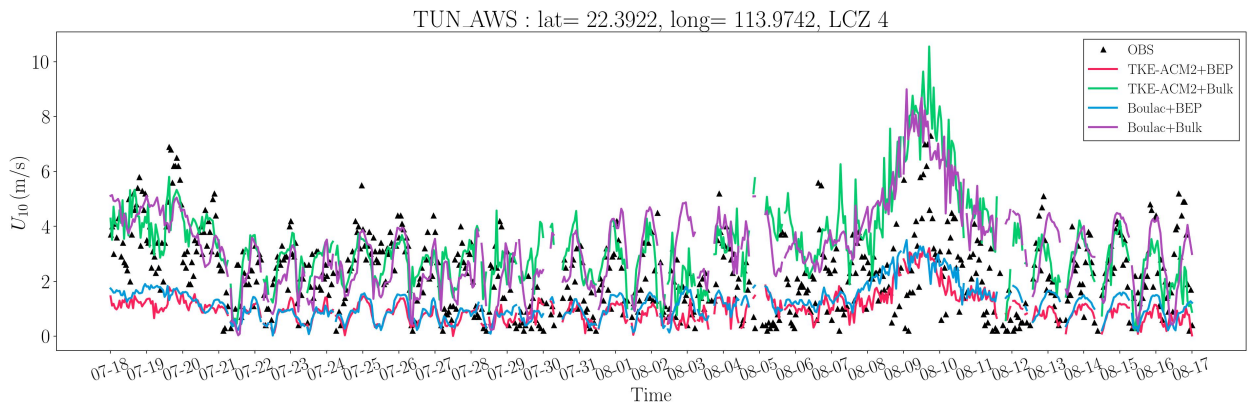

Figure S-35:  $U_{10}$  at TUN\_AWS station.

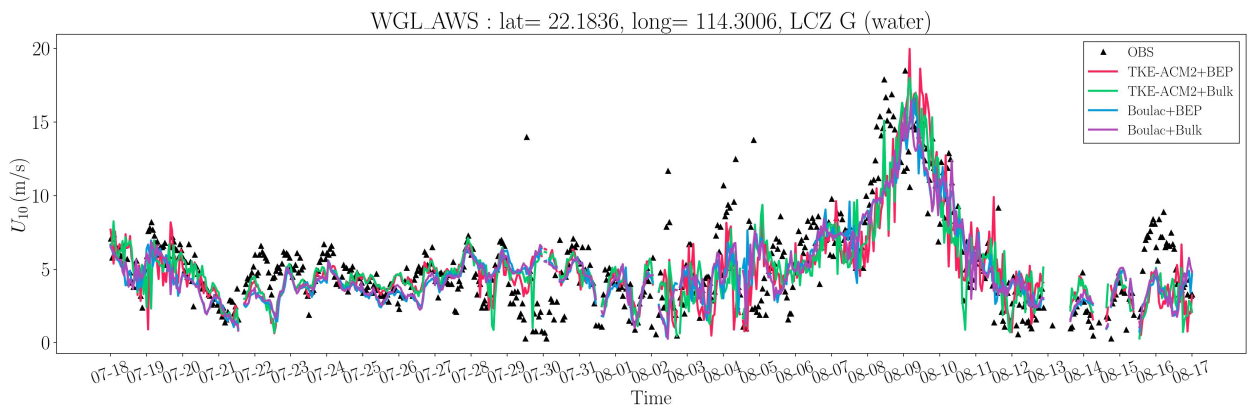

Figure S-36:  $U_{10}$  at WGL\_AWS station.

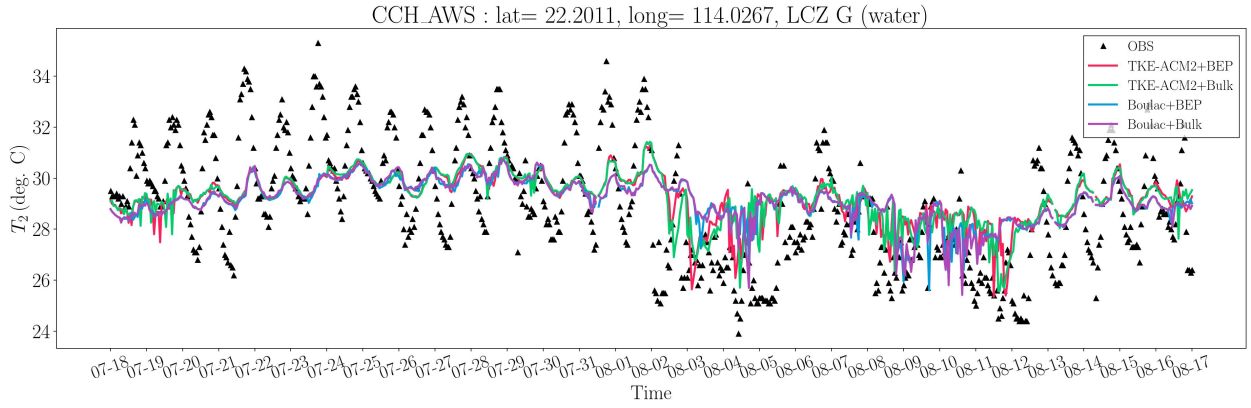

Figure S-37:  $T_2$  at CCH\_AWS station.

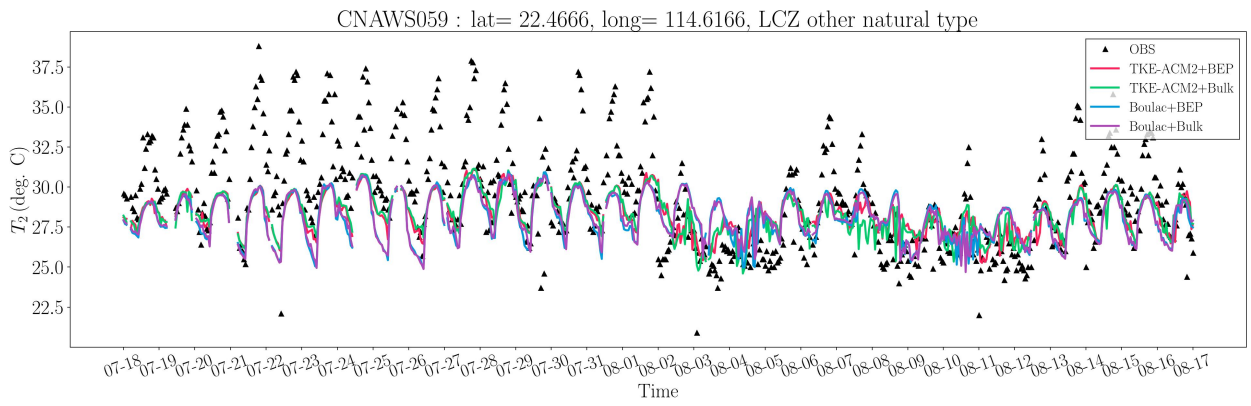

Figure S-38:  $T_2$  at CNAWS059 station.

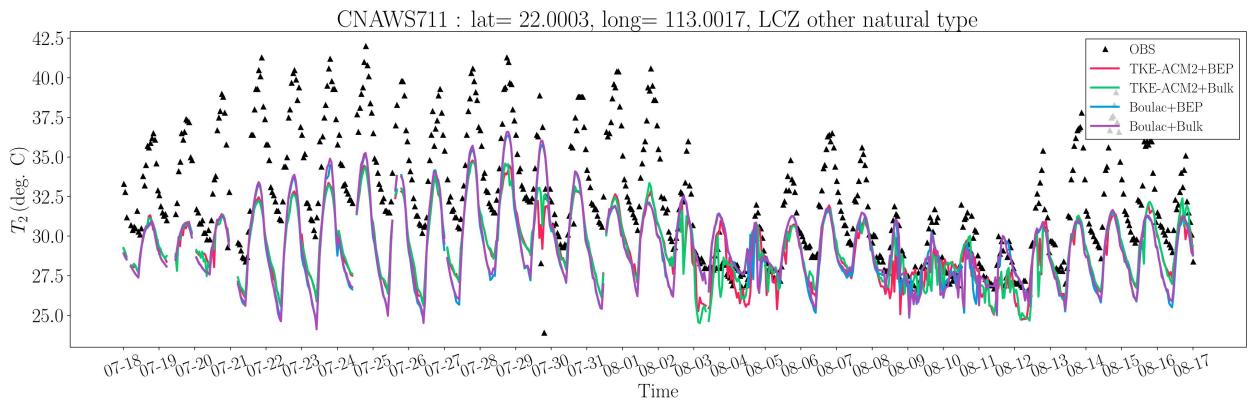

Figure S-39:  $T_2$  at CNAWS711 station.

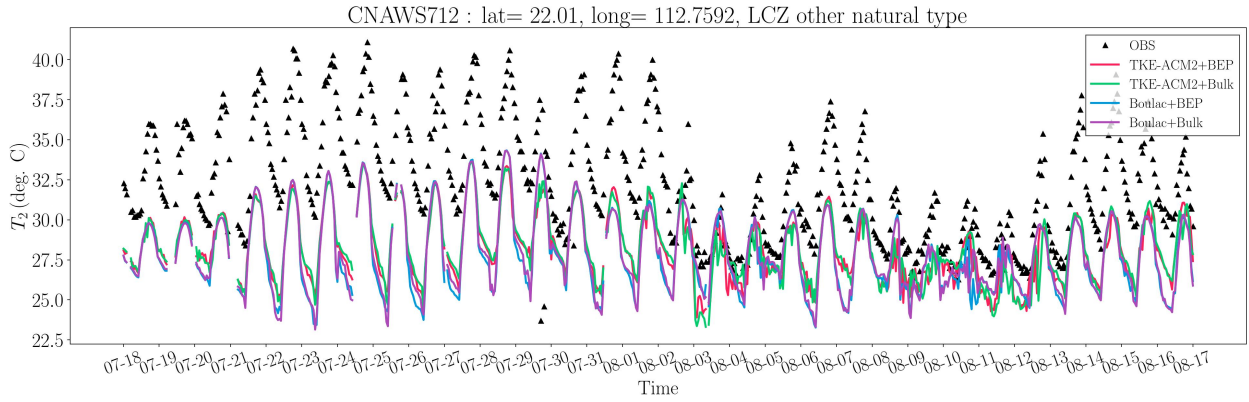

Figure S-40:  $T_2$  at CNAWS712 station.

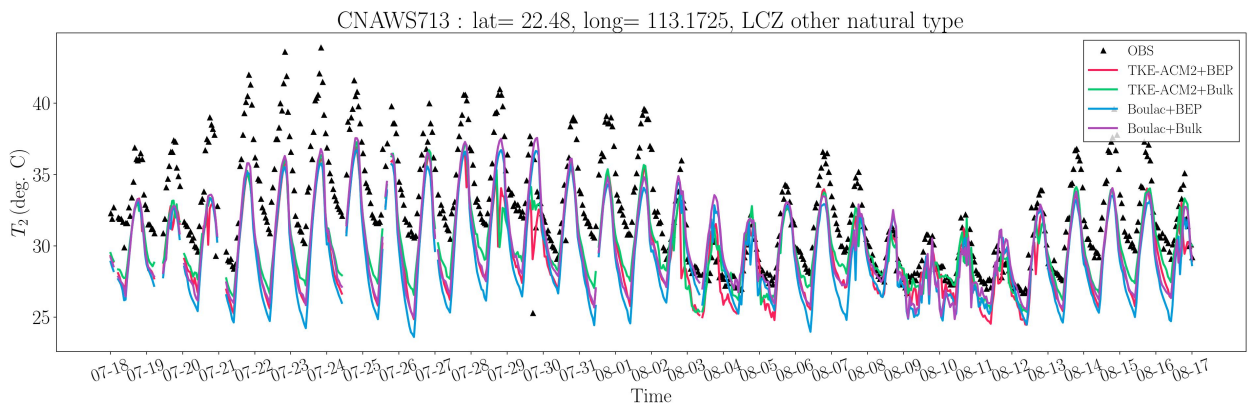

Figure S-41:  $T_2$  at CNAWS713 station.

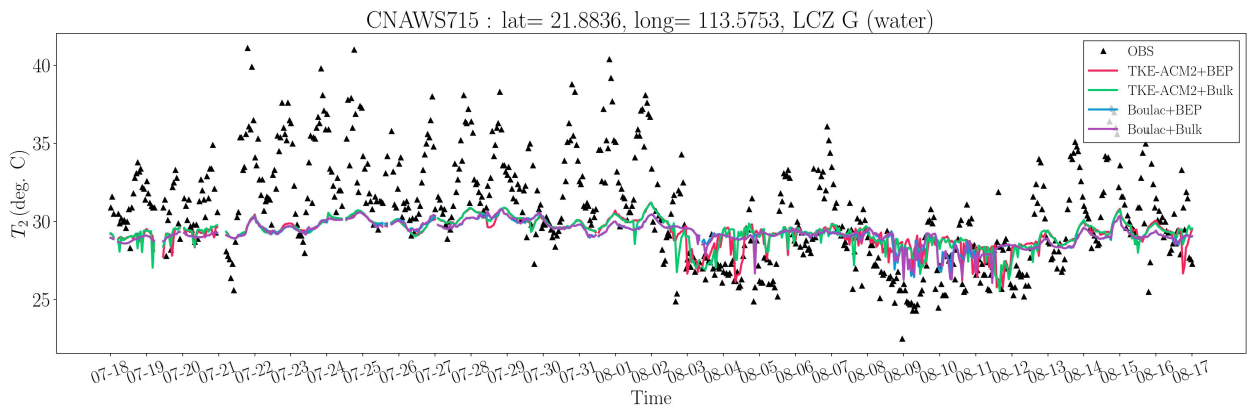

Figure S-42:  $T_2$  at CNAWS715 station.

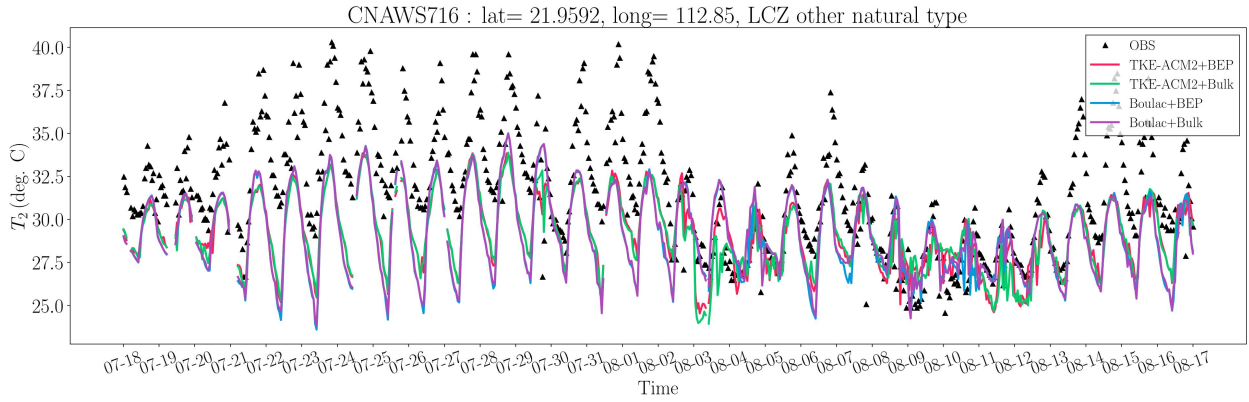

Figure S-43:  $ST_2$  at CNAWS716 station.

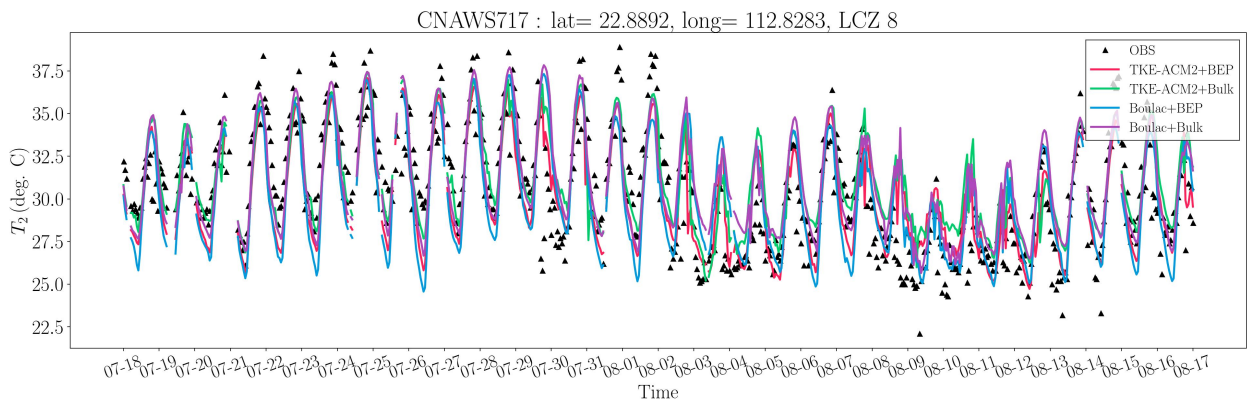

Figure S-44:  $ST_2$  at CNAWS717 station.

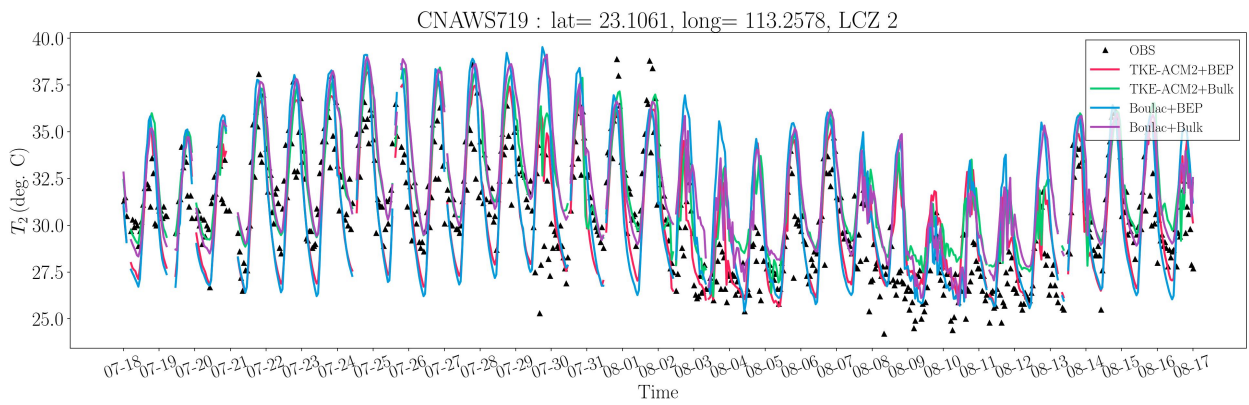

Figure S-45:  $ST_2$  at CNAWS719 station.



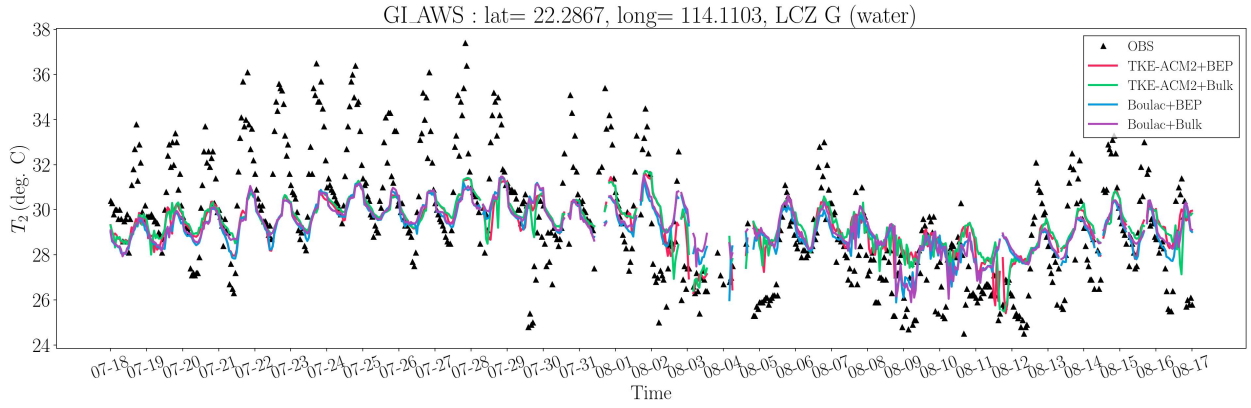

Figure S-46:  $T_2$  at GI\_AWS station.

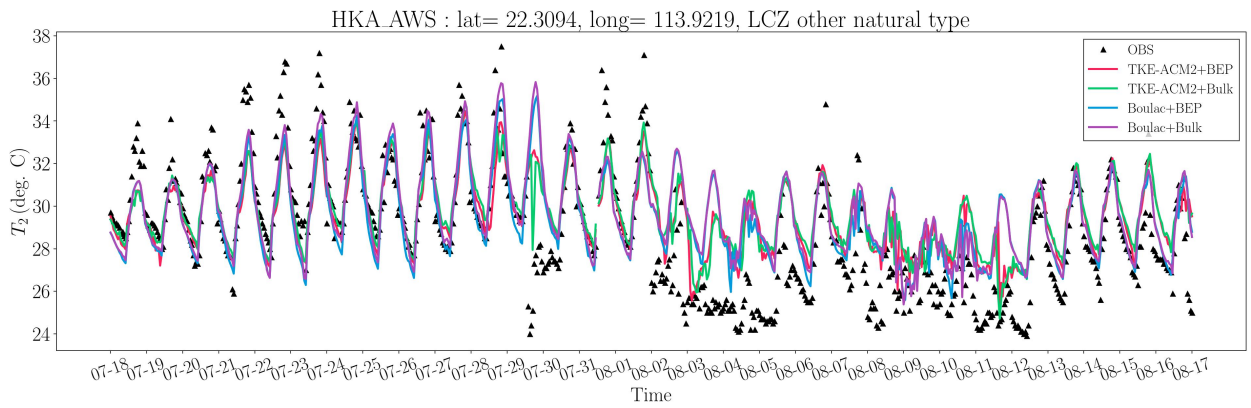

Figure S-47:  $T_2$  at HKA\_AWS station.

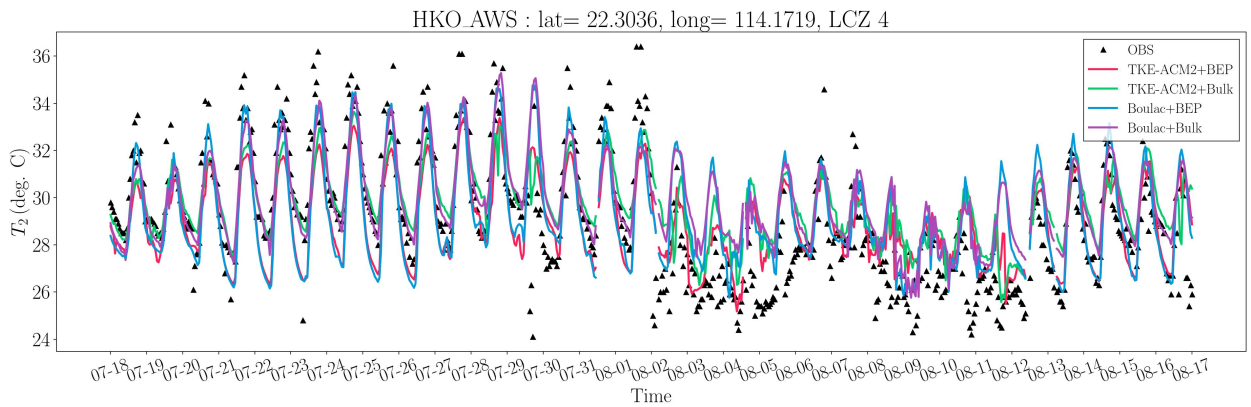

Figure S-48:  $T_2$  at HKO\_AWS station.

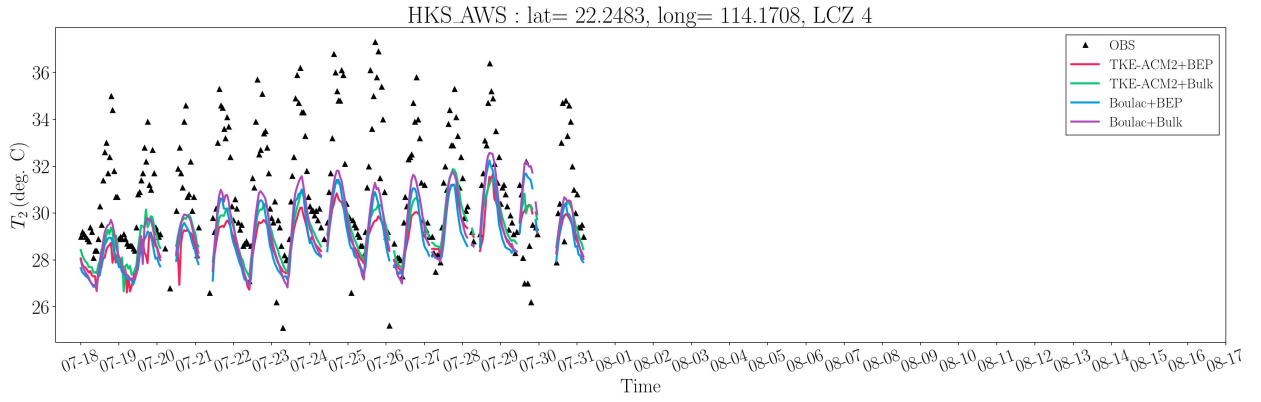

Figure S-49:  $T_2$  at HKS\_AWS station.

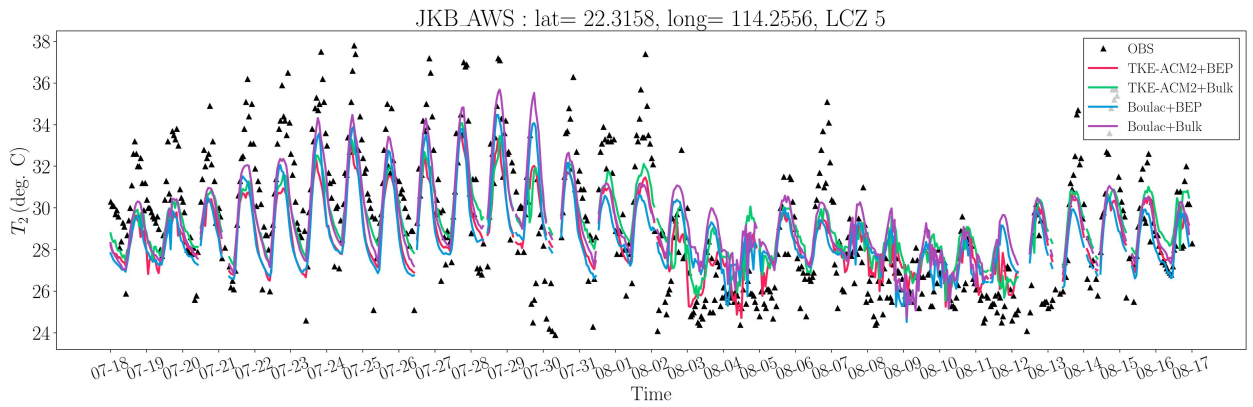

Figure S-50:  $T_2$  at JKB\_AWS station.

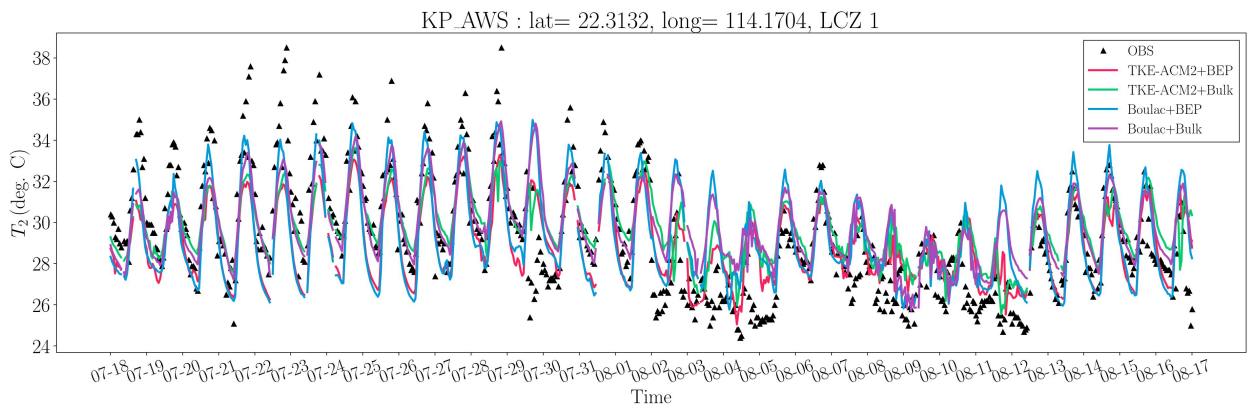

Figure S-51:  $T_2$  at KP\_AWS station.

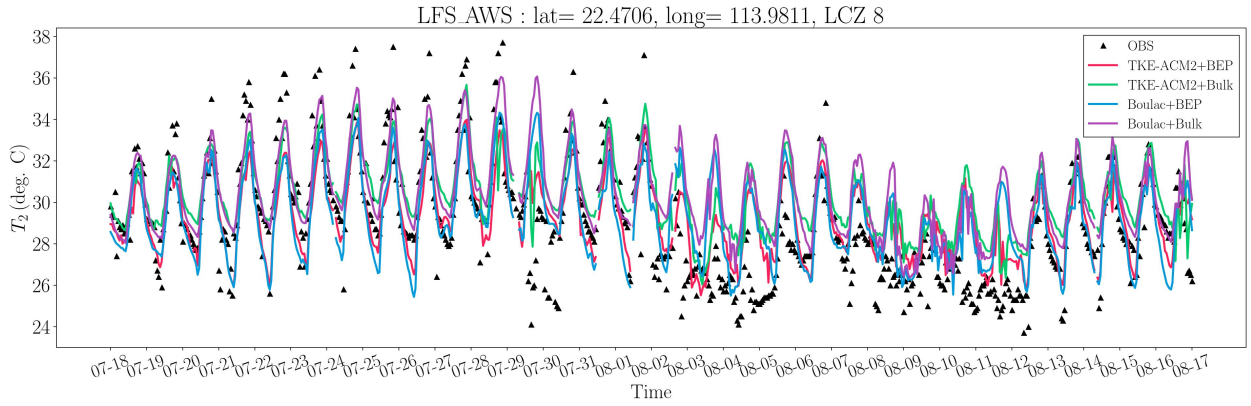

Figure S-52:  $T_2$  at LFS\_AWS station.

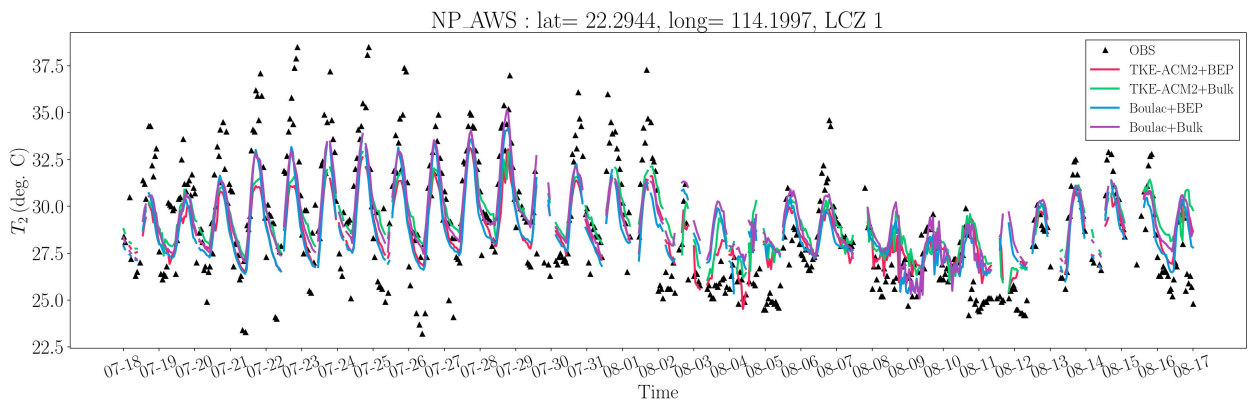

Figure S-53:  $T_2$  at NP\_AWS station.

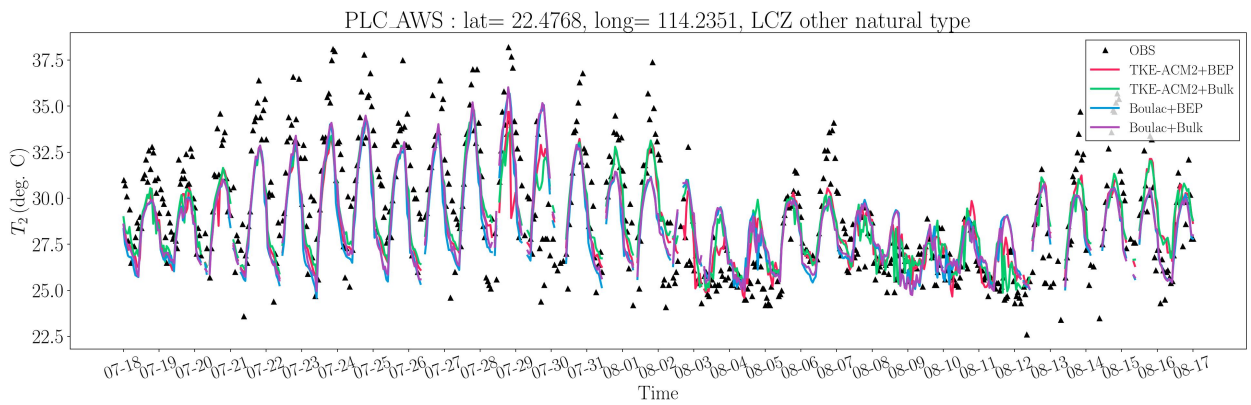

Figure S-54:  $T_2$  at PLC\_AWS station.

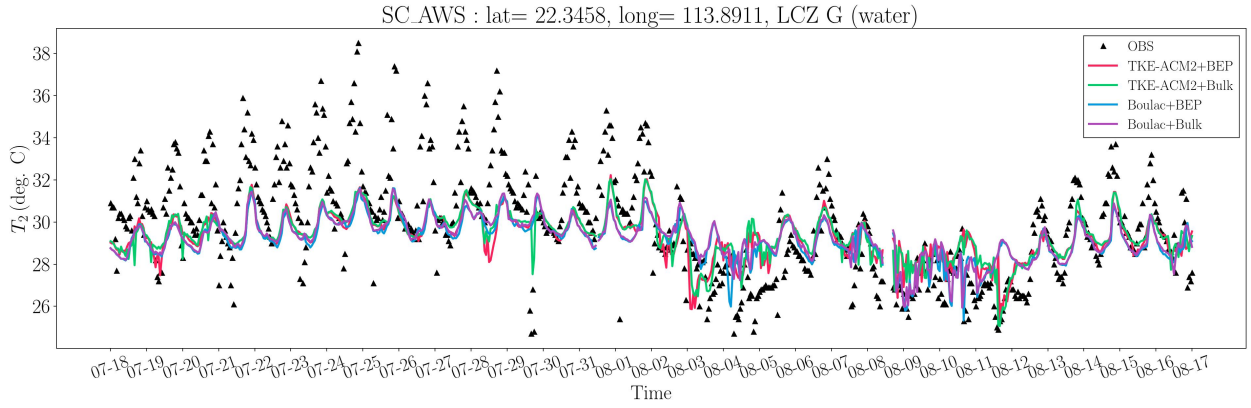

Figure S-55:  $T_2$  at SC\_AWS station.

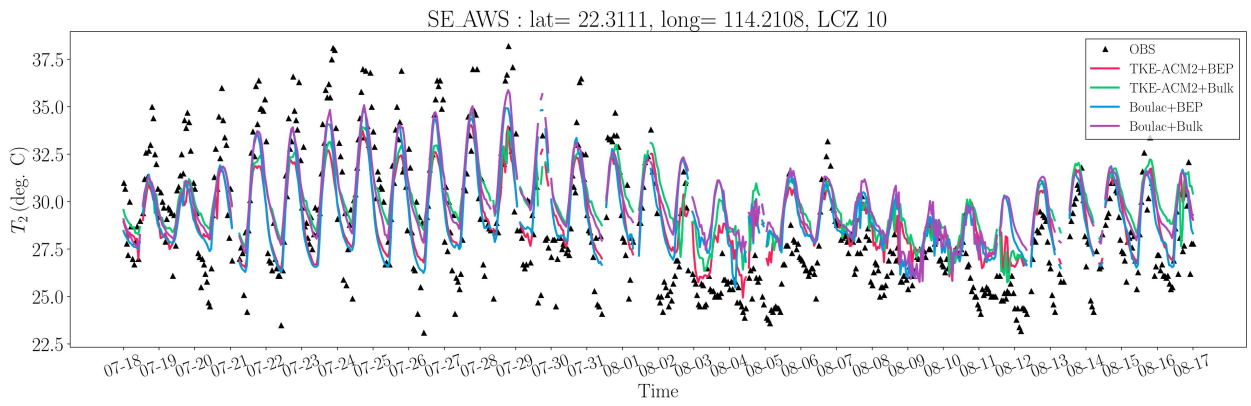

Figure S-56:  $T_2$  at SE\_AWS station.

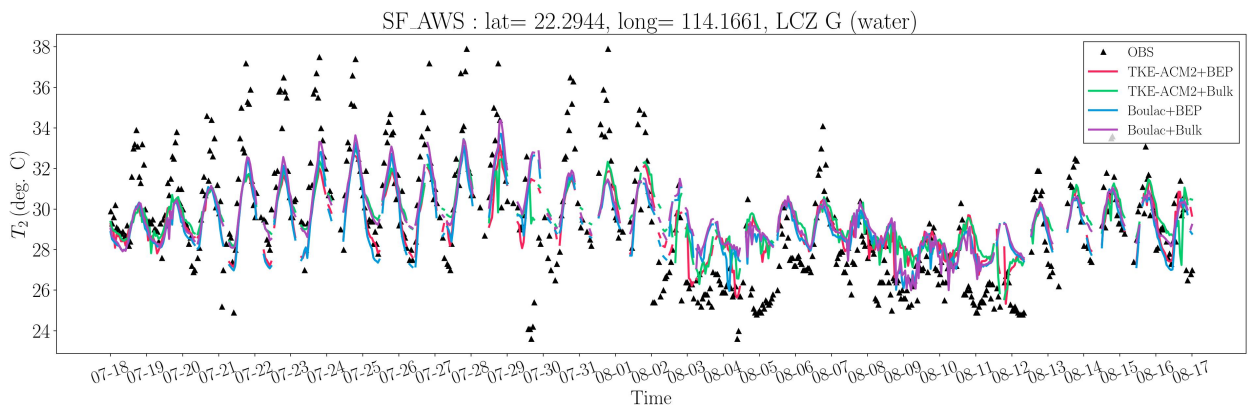

Figure S-57:  $T_2$  at SF\_AWS station.



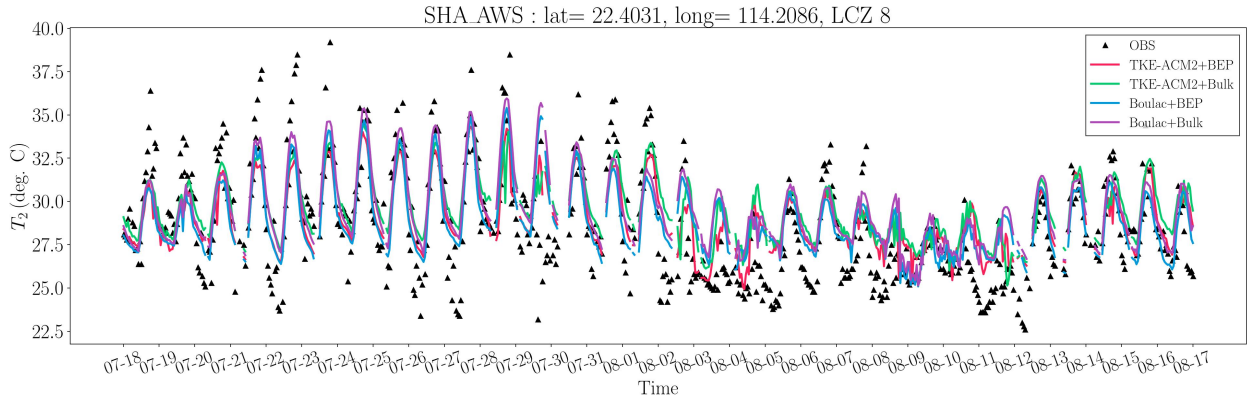

Figure S-58:  $T_2$  at SHA\_AWS station.

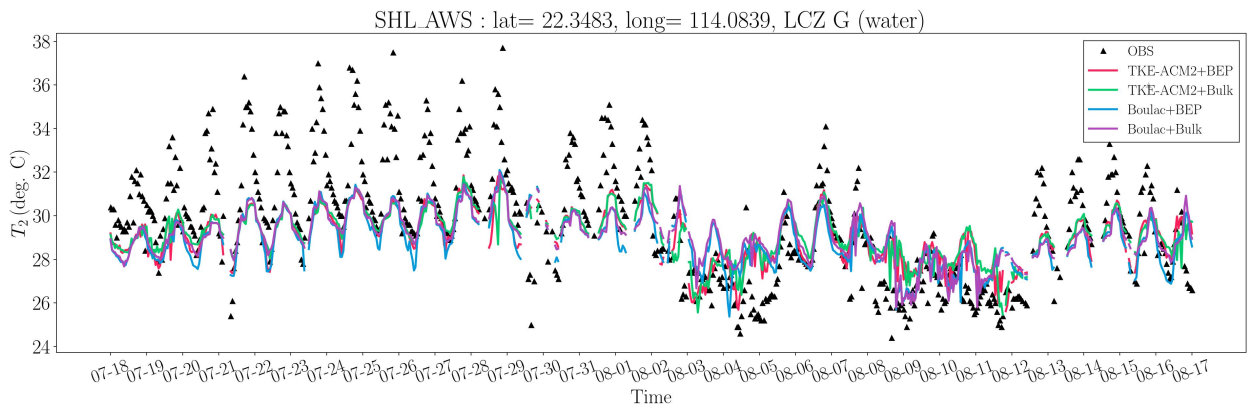

Figure S-59:  $T_2$  at SHL\_AWS station.

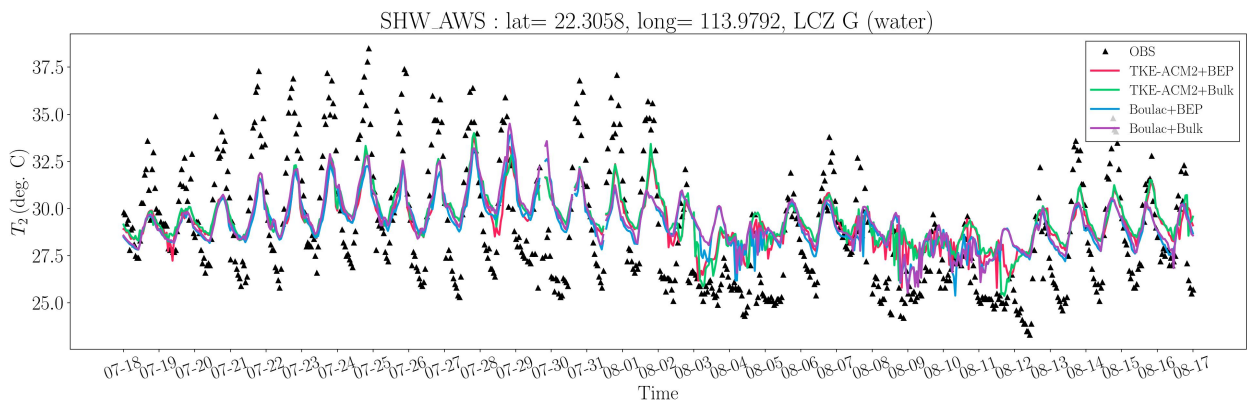

Figure S-60:  $T_2$  at SHW\_AWS station.

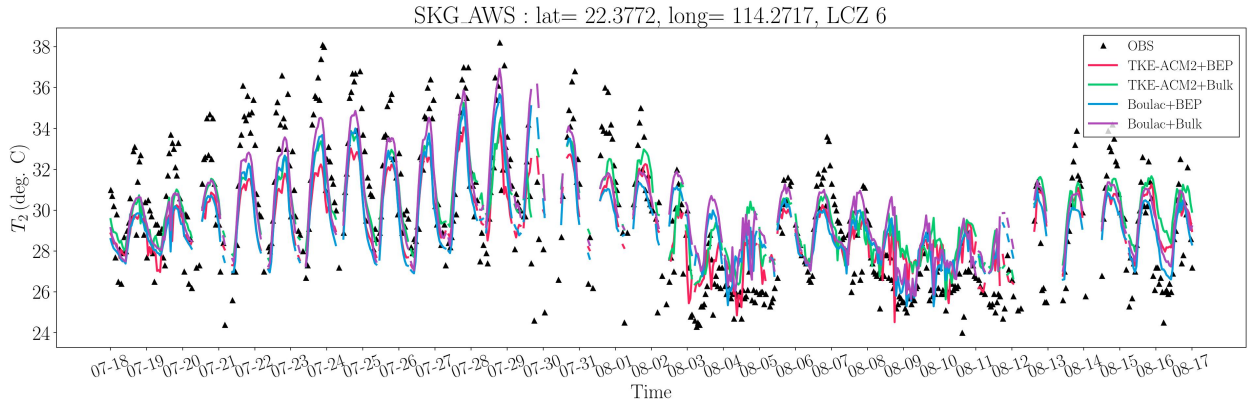

Figure S-61:  $T_2$  at SKG\_AWS station.

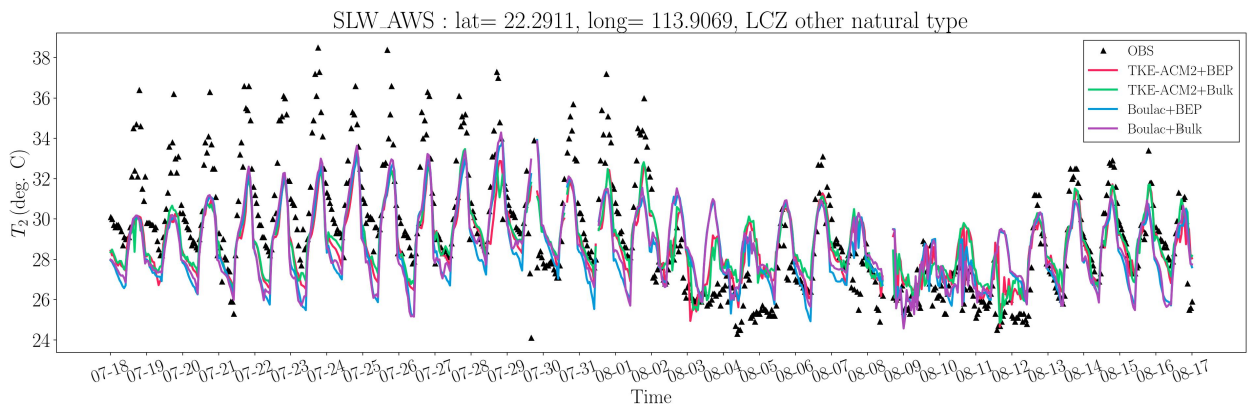

Figure S-62:  $T_2$  at SLW\_AWS station.

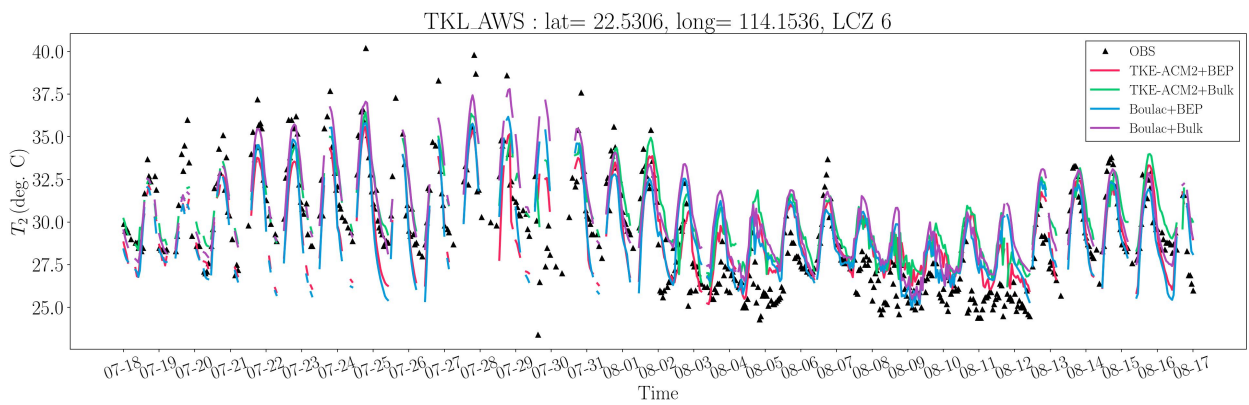

Figure S-63:  $T_2$  at TKL\_AWS station.

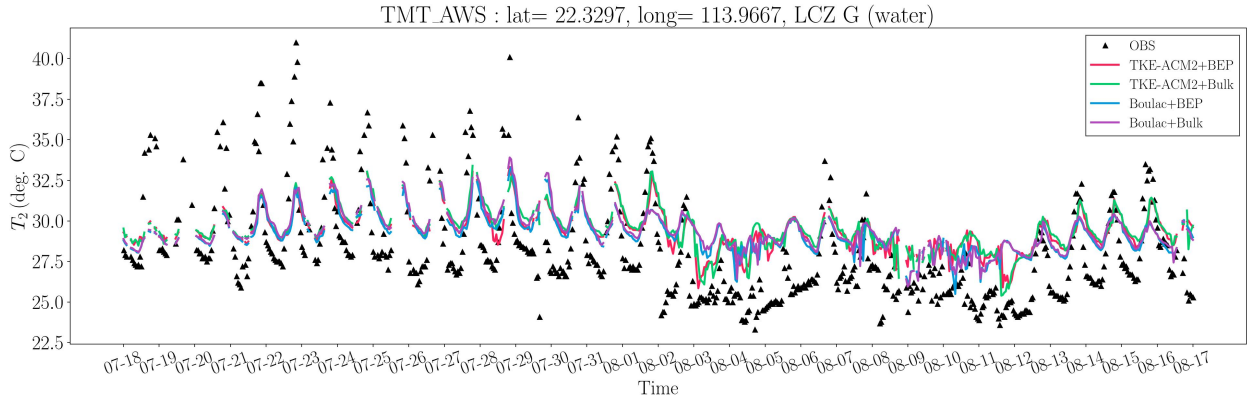

Figure S-64:  $ST_{2}$  at TMT\_AWS station.

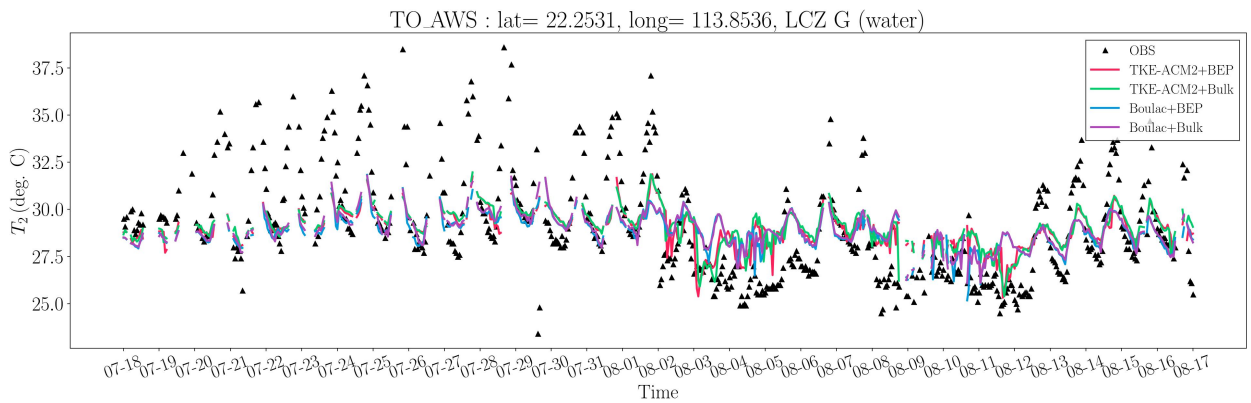

Figure S-65:  $ST_{2}$  at TO\_AWS station.

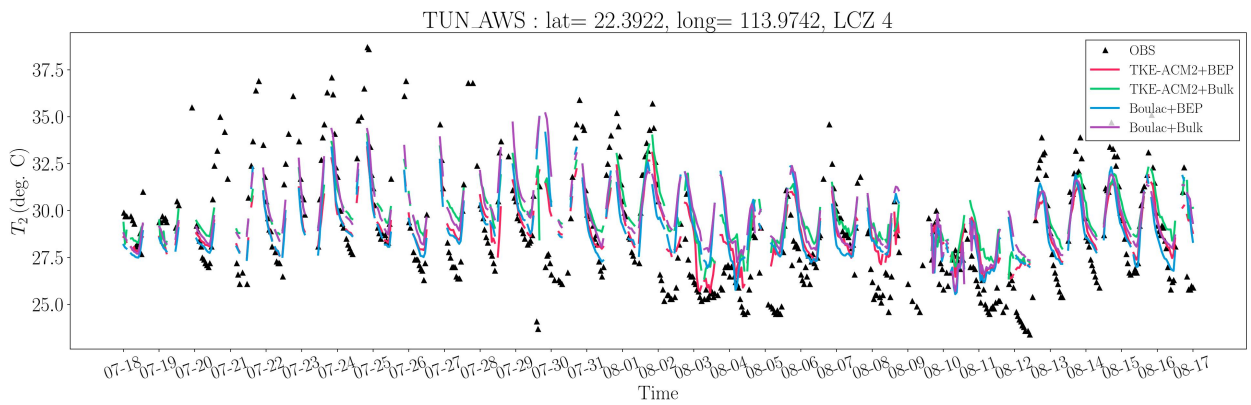

Figure S-66:  $ST_{2}$  at TUN\_AWS station.

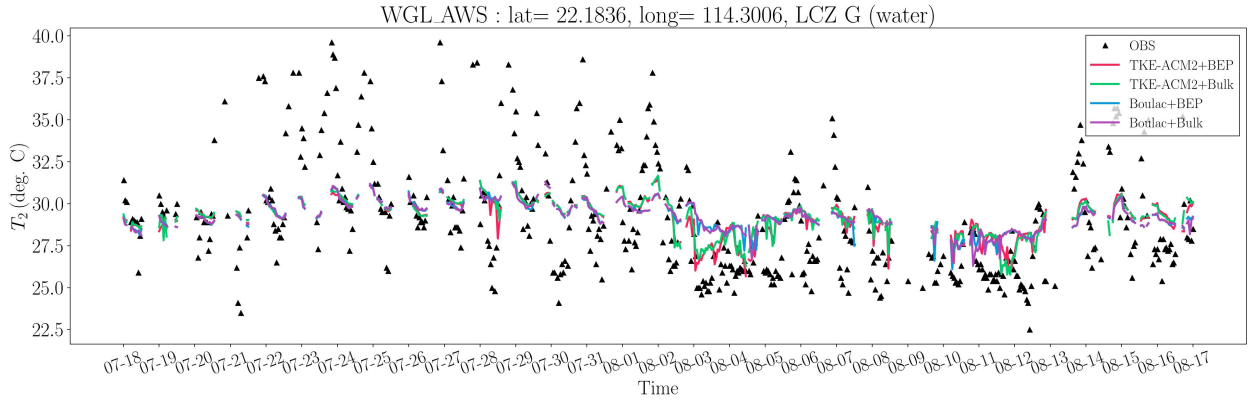

Figure S-67:  $T_2$  at WGL\_AWS station.

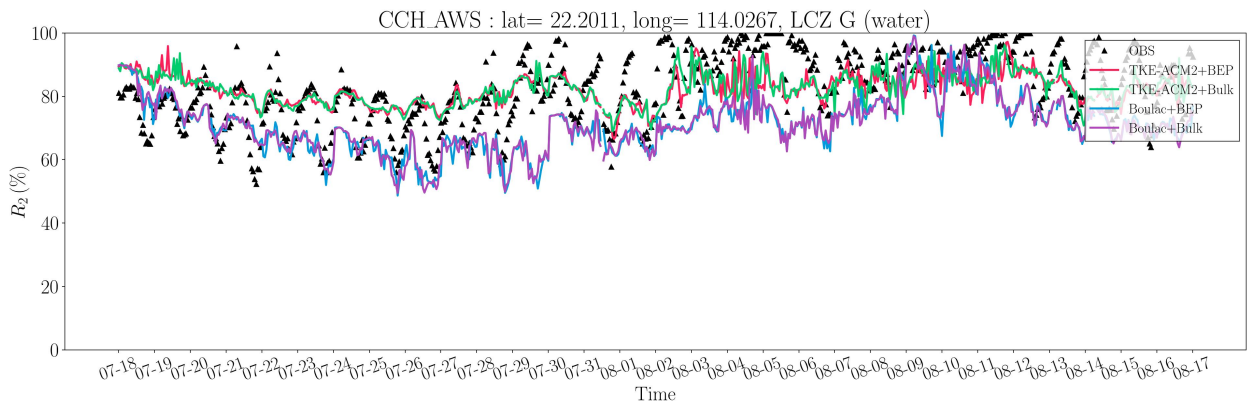

Figure S-68:  $SRH_2$  at CCH\_AWS station.

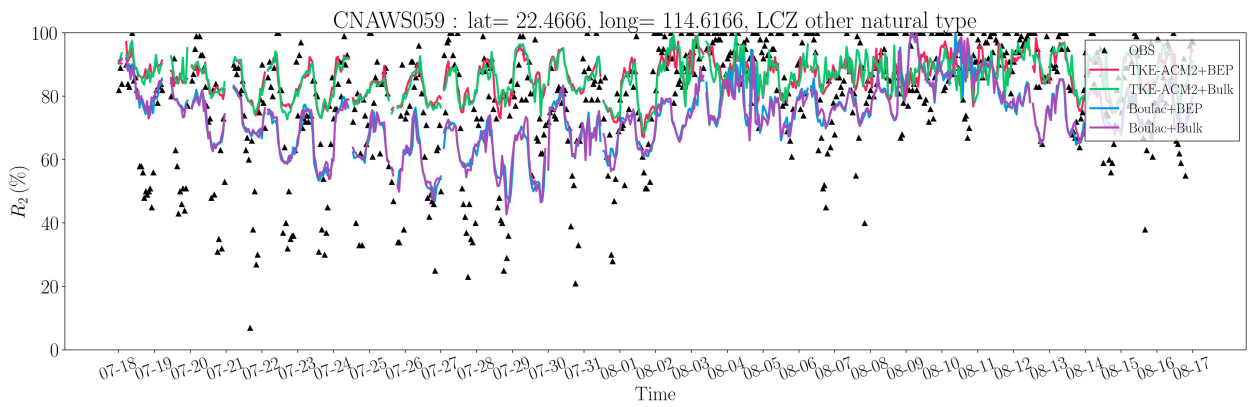

Figure S-69:  $SRH_2$  at CNAWS059 station.



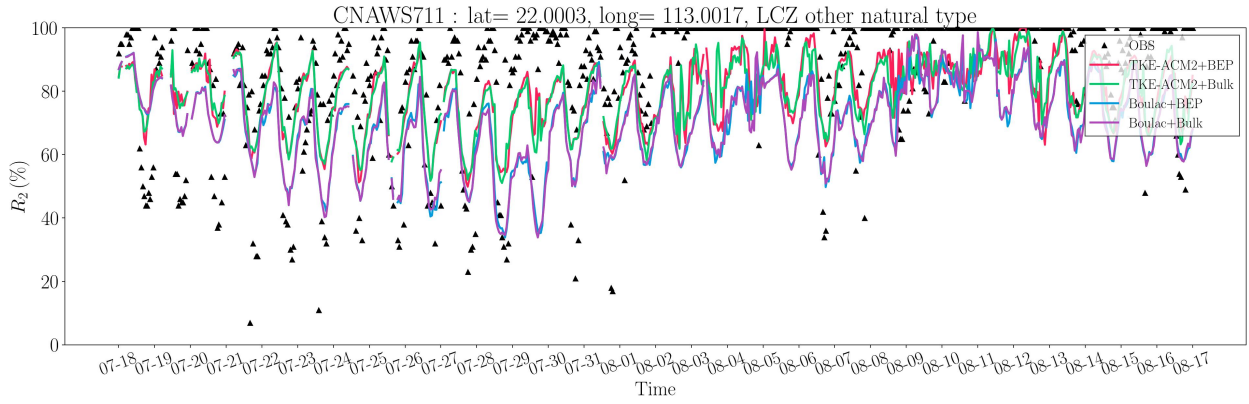

Figure S-70:  $SRH_2$  at CNAWS711 station.

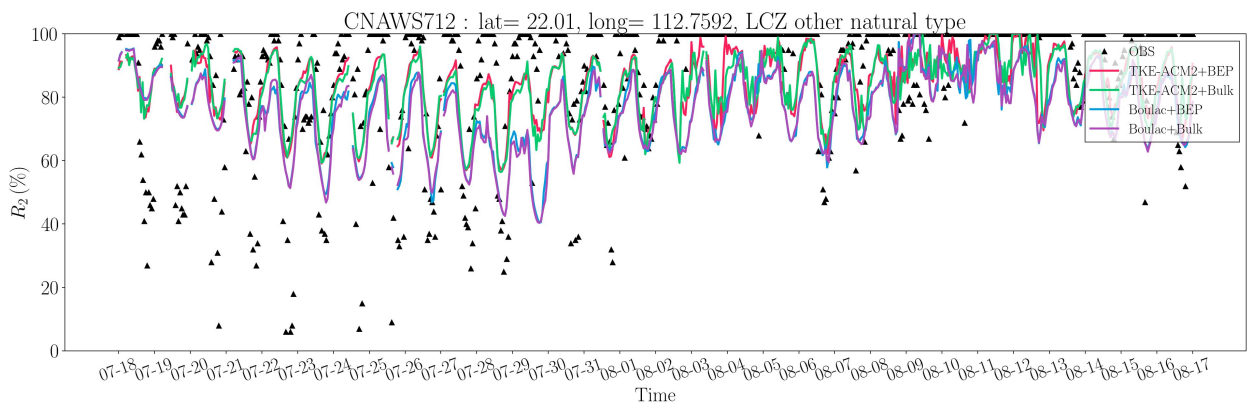

Figure S-71:  $SRH_2$  at CNAWS712 station.

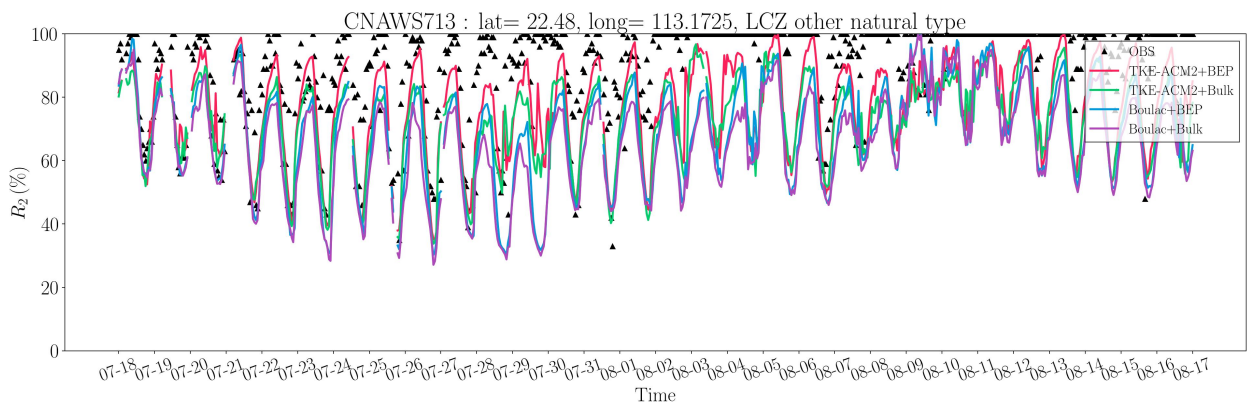

Figure S-72:  $SRH_2$  at CNAWS713 station.

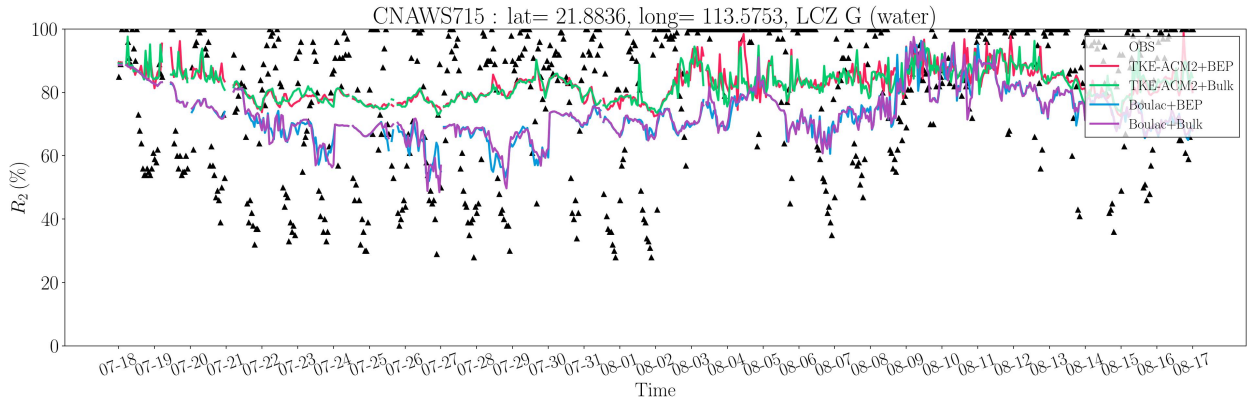

Figure S-73:  $SRH_2$  at CNAWS715 station.

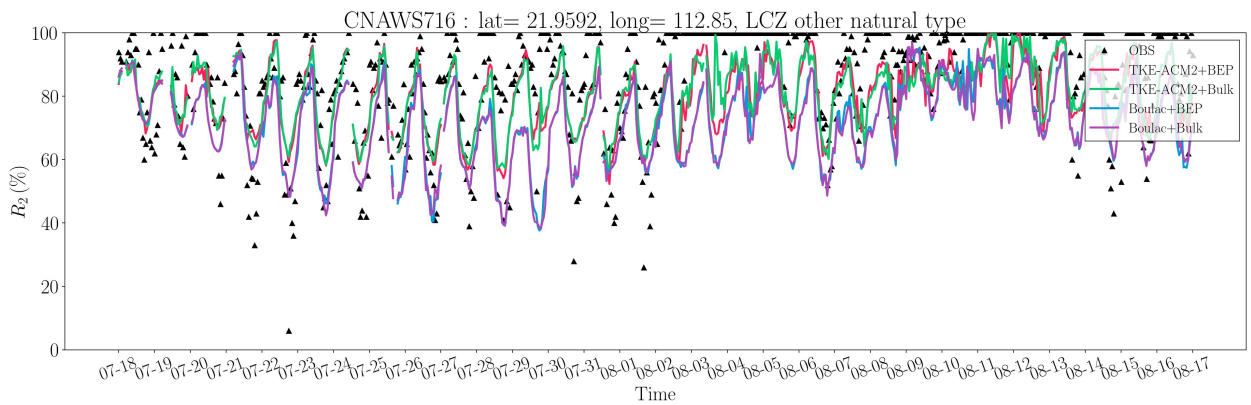

Figure S-74:  $SRH_2$  at CNAWS716 station.

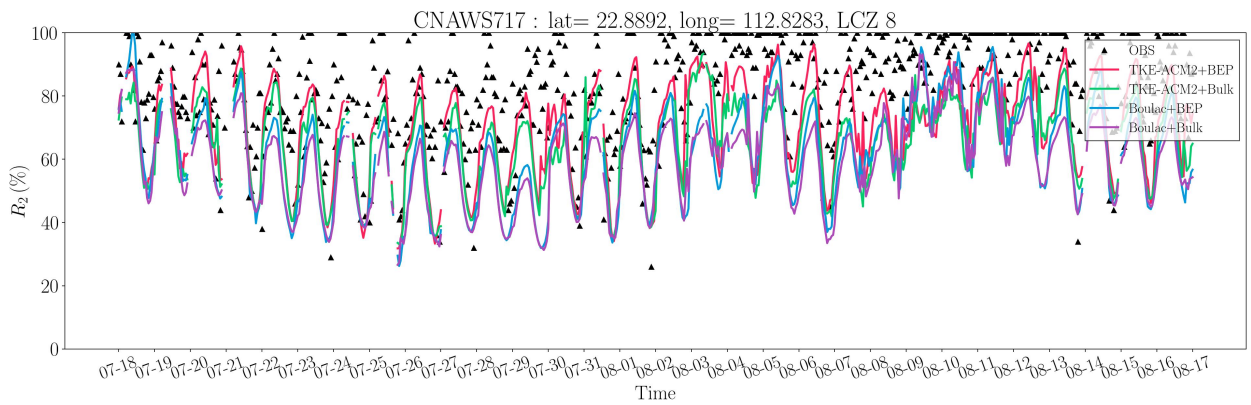

Figure S-75:  $SRH_2$  at CNAWS717 station.

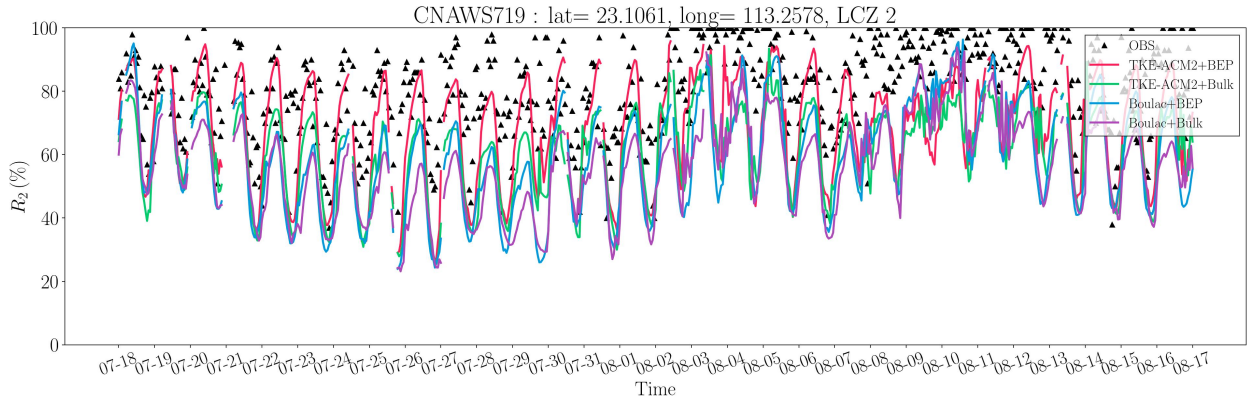

Figure S-76:  $SRH_2$  at CNAWS719 station.

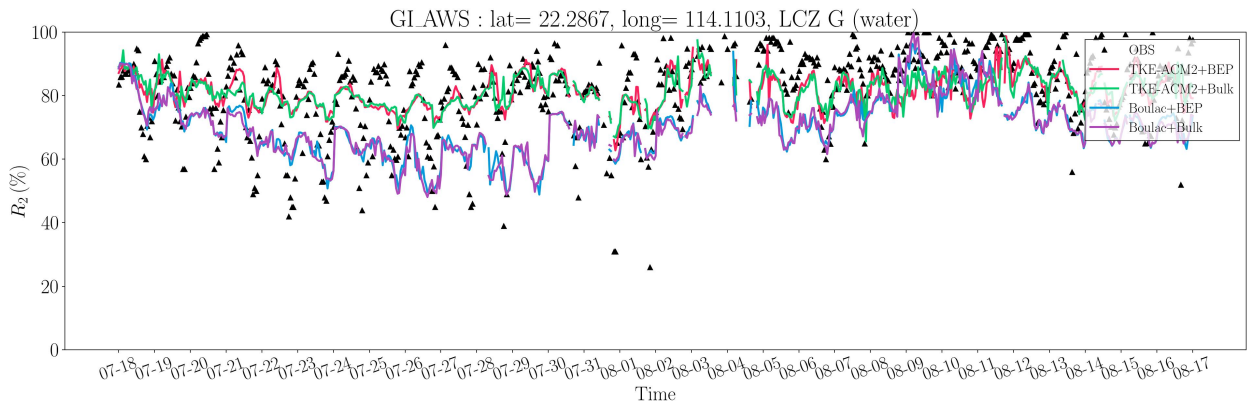

Figure S-77:  $SRH_2$  at GI\_AWS station.

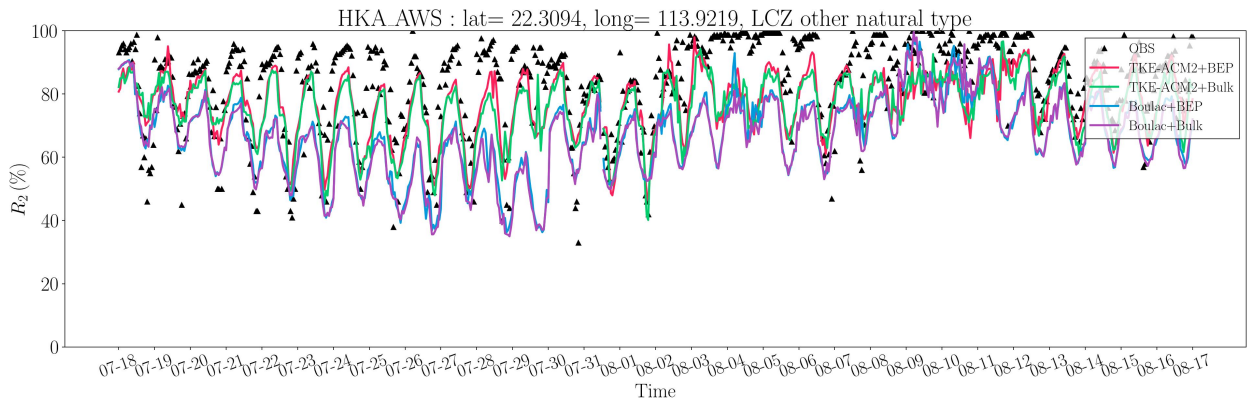

Figure S-78:  $SRH_2$  at HKA\_AWS station.

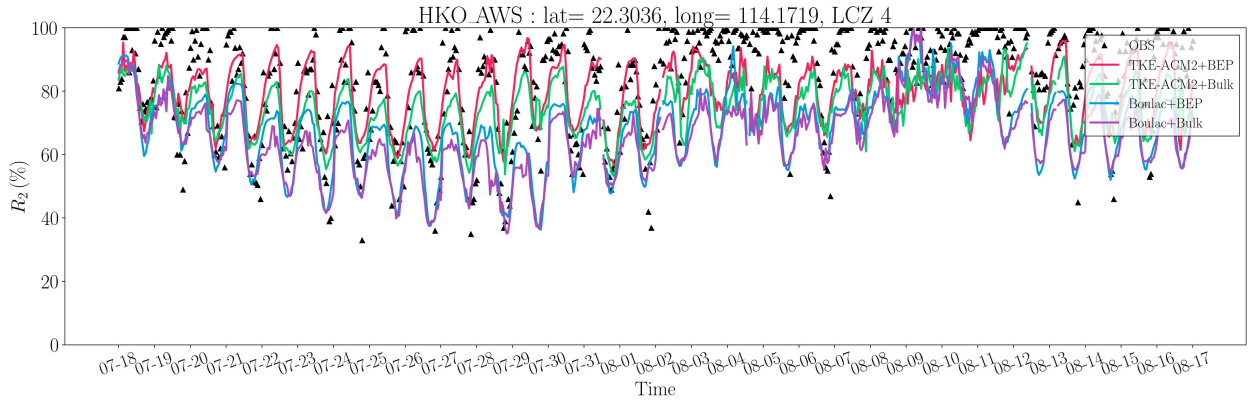

Figure S-79:  $R_2$  at HKO\_AWS station.

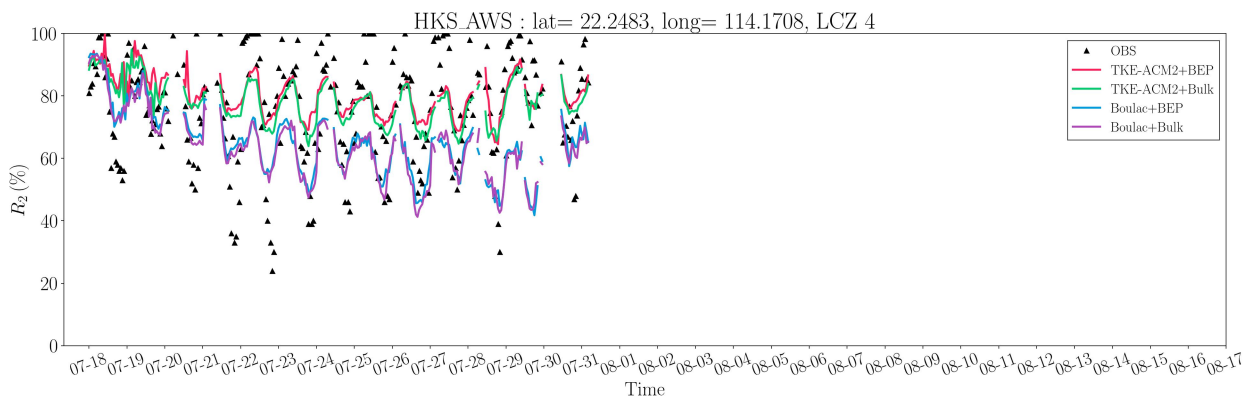

Figure S-80:  $R_2$  at HKS\_AWS station.

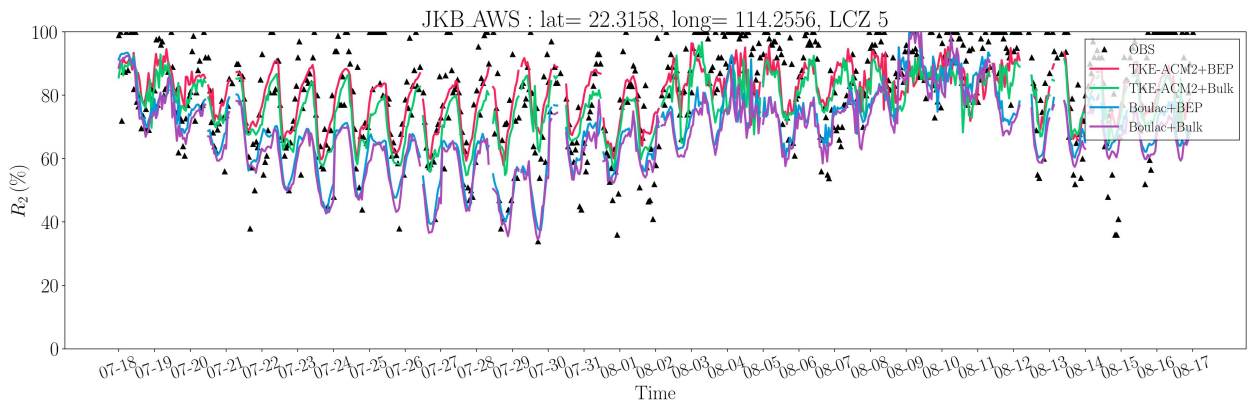

Figure S-81:  $R_2$  at JKB\_AWS station.



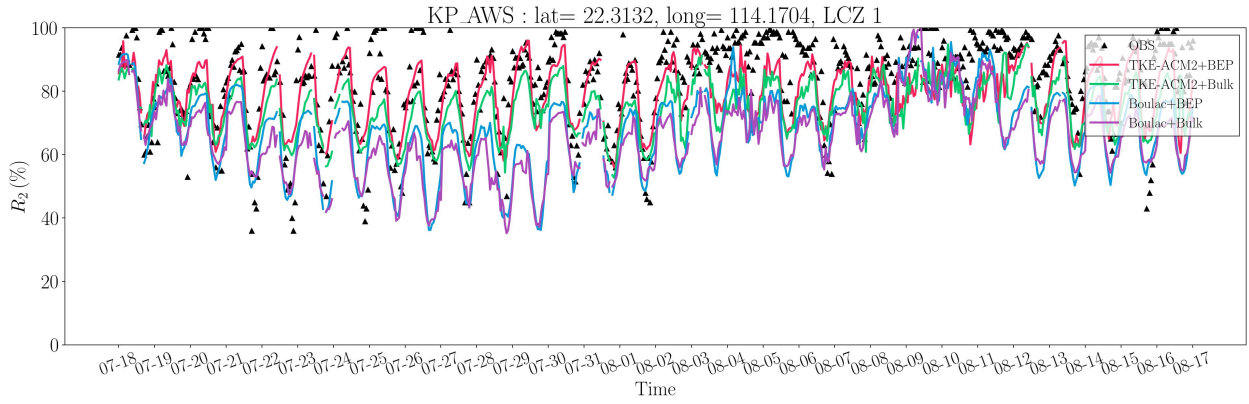

Figure S-82:  $SRH_2$  at KP\_AWS station.

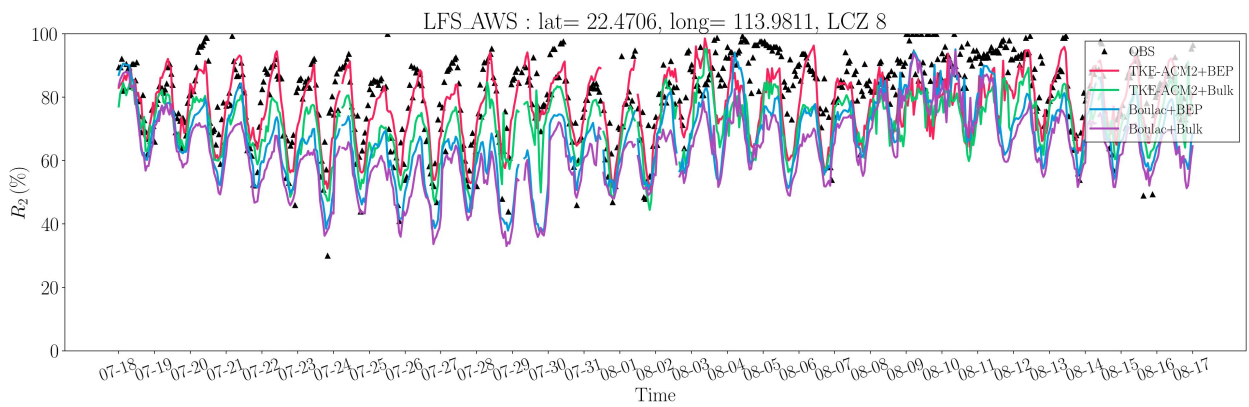

Figure S-83:  $SRH_2$  at LFS\_AWS station.

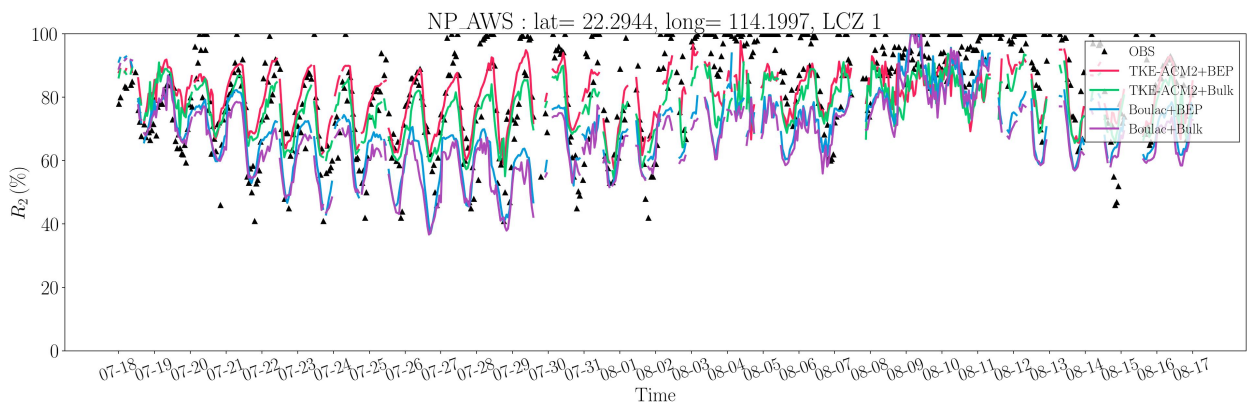

Figure S-84:  $SRH_2$  at NP\_AWS station.

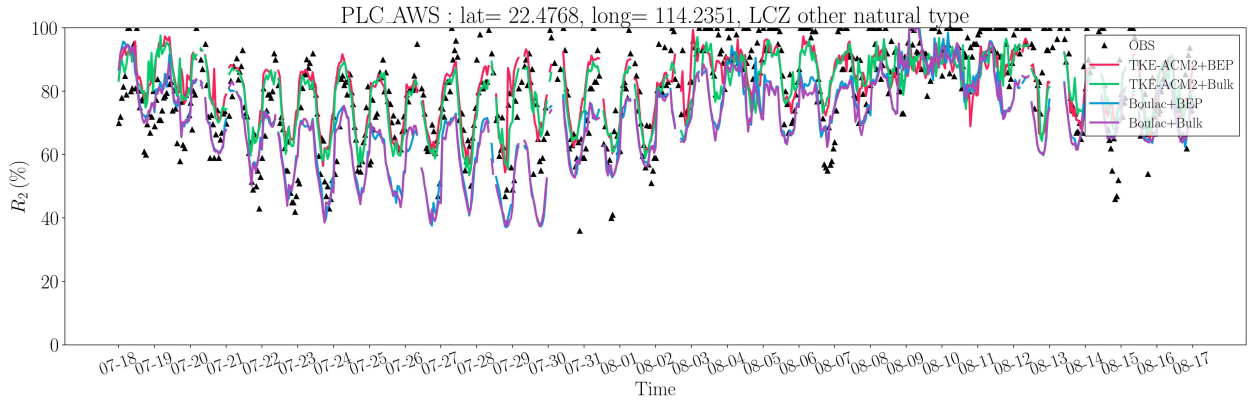

Figure S-85:  $SRH_2$  at PLC\_AWS station.

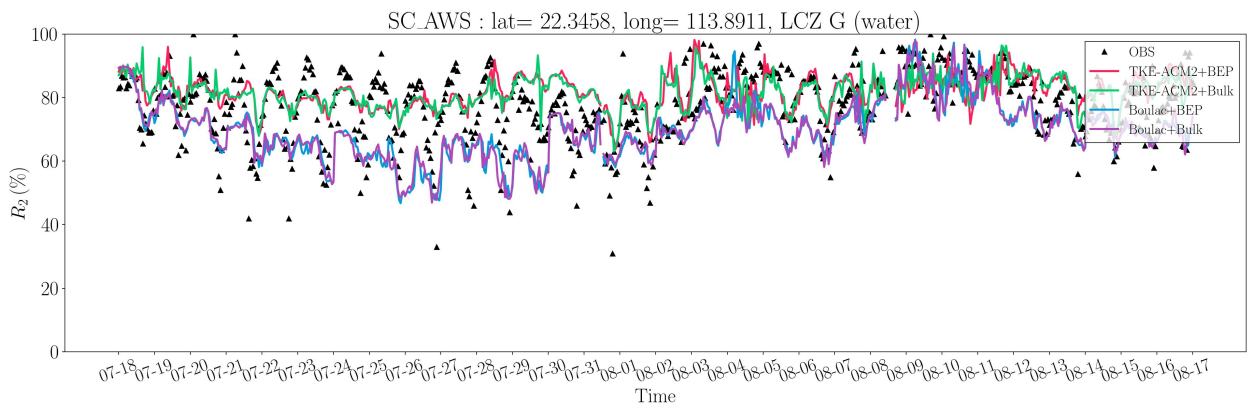

Figure S-86:  $SRH_2$  at SC\_AWS station.

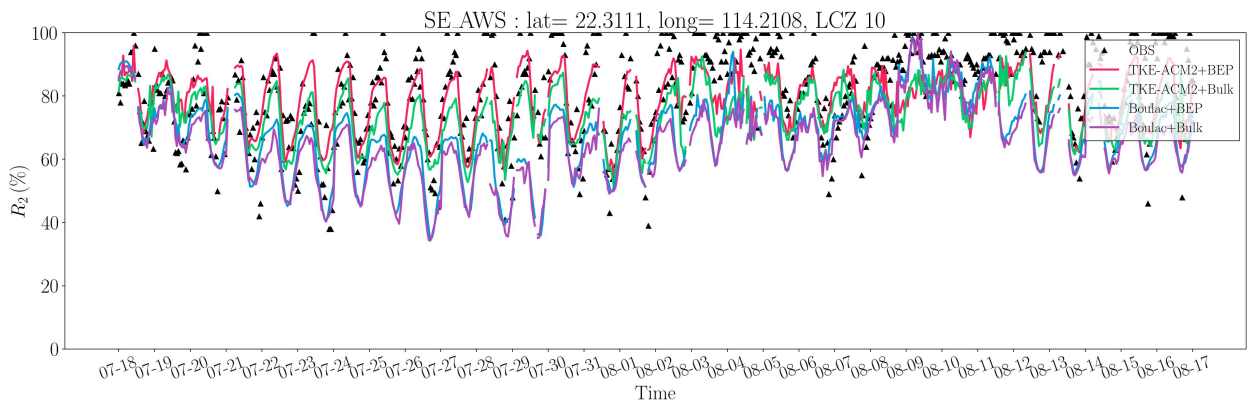

Figure S-87:  $SRH_2$  at SE\_AWS station.

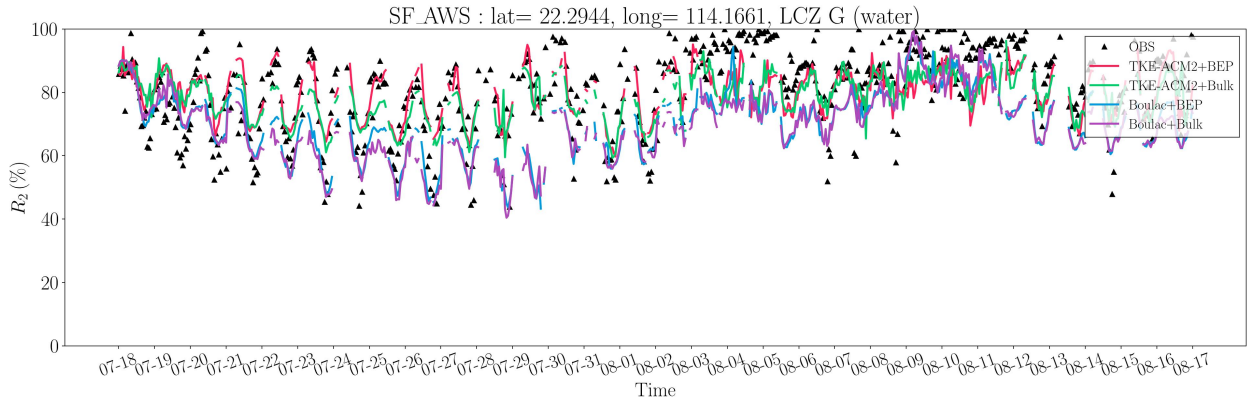

Figure S-88:  $SRH_2$  at SF\_AWS station.

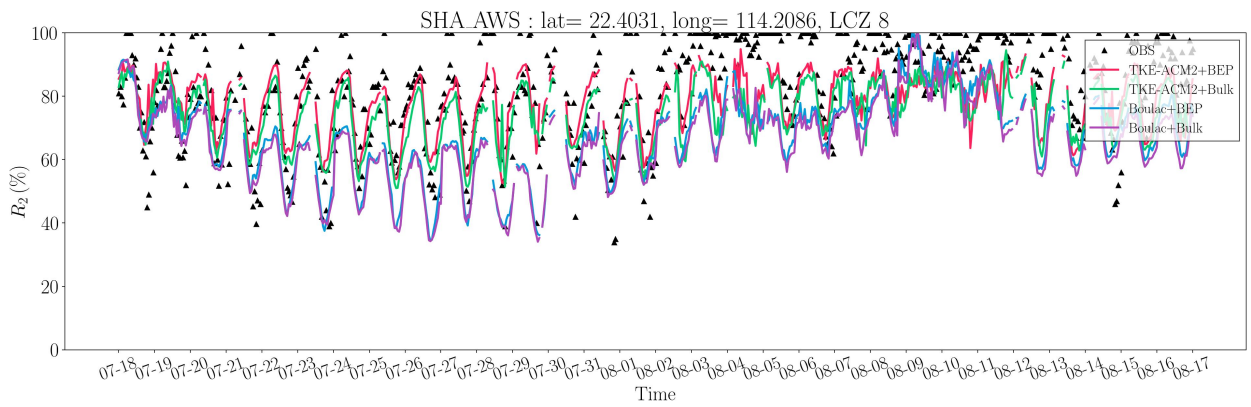

Figure S-89:  $SRH_2$  at SHA\_AWS station.

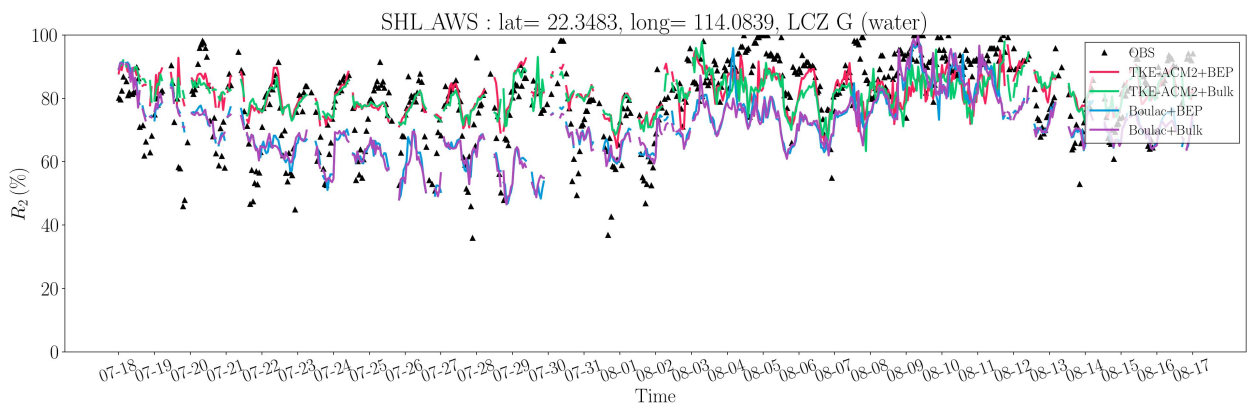

Figure S-90:  $SRH_2$  at SHL\_AWS station.

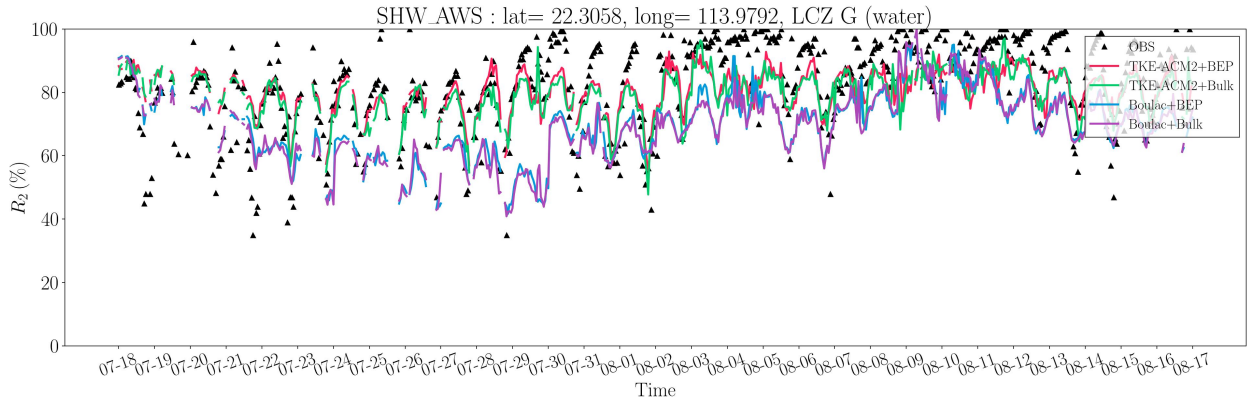

Figure S-91:  $R_2$  at SHW\_AWS station.

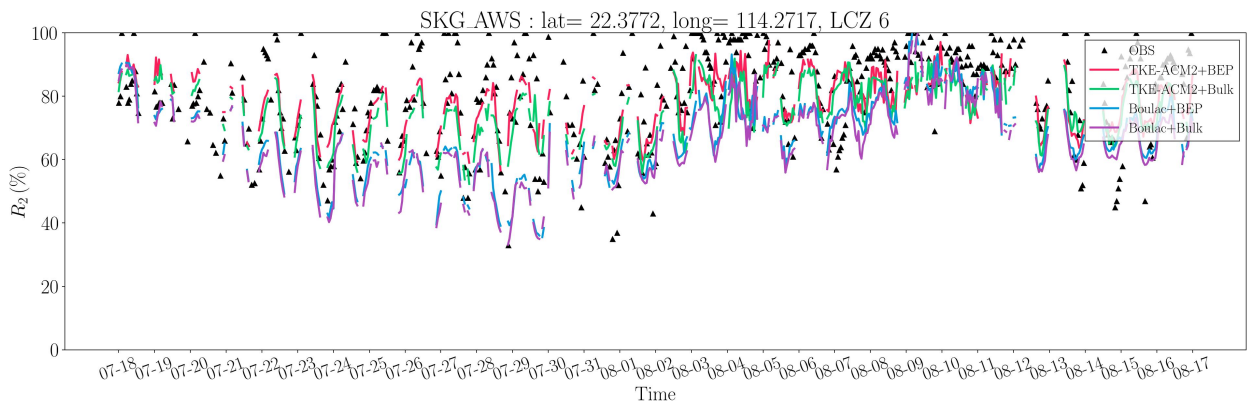

Figure S-92:  $R_2$  at SKG\_AWS station.

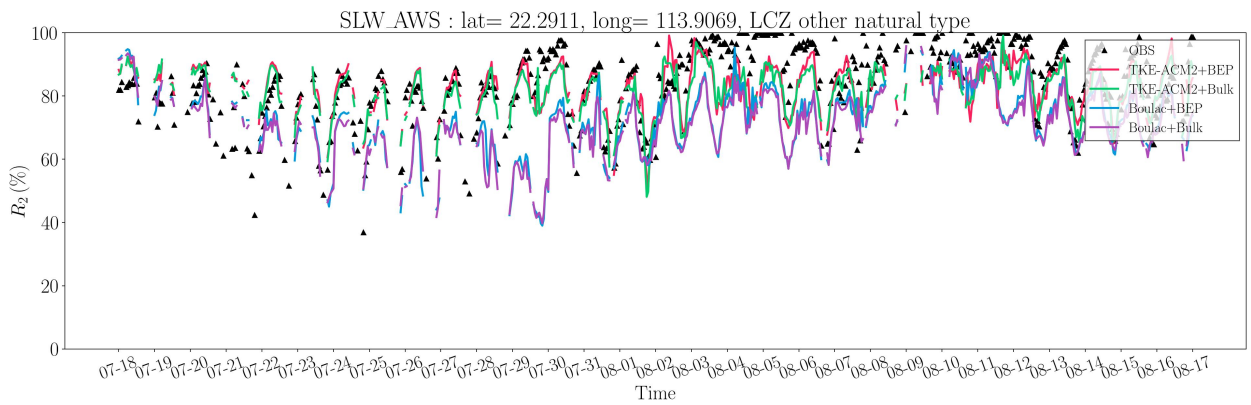

Figure S-93:  $R_2$  at SLW\_AWS station.



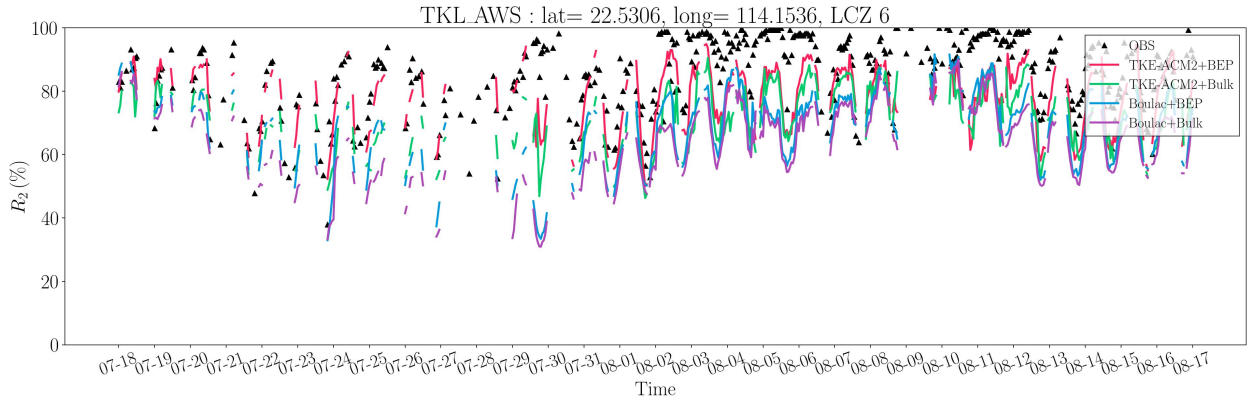

Figure S-94:  $R_2$  at TKL\_AWS station.

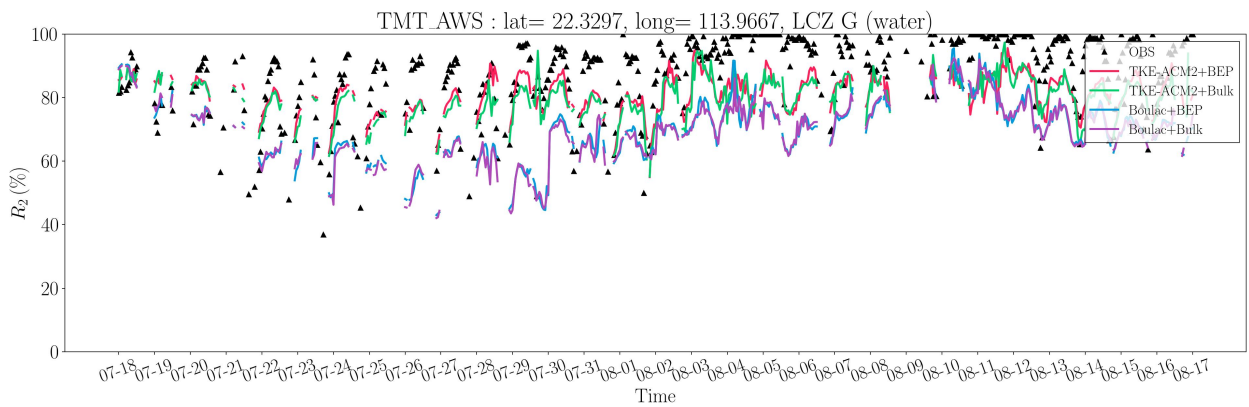

Figure S-95:  $R_2$  at TMT\_AWS station.

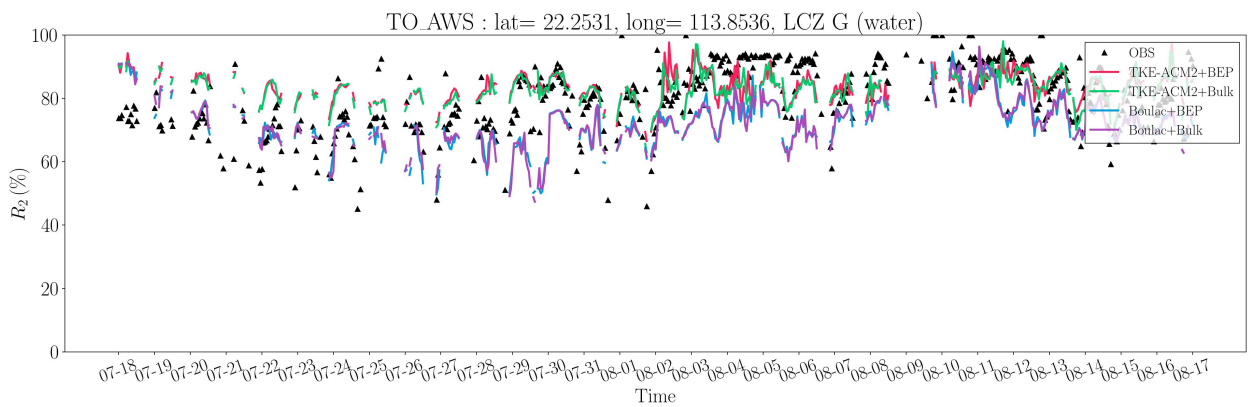

Figure S-96:  $R_2$  at TO\_AWS station.

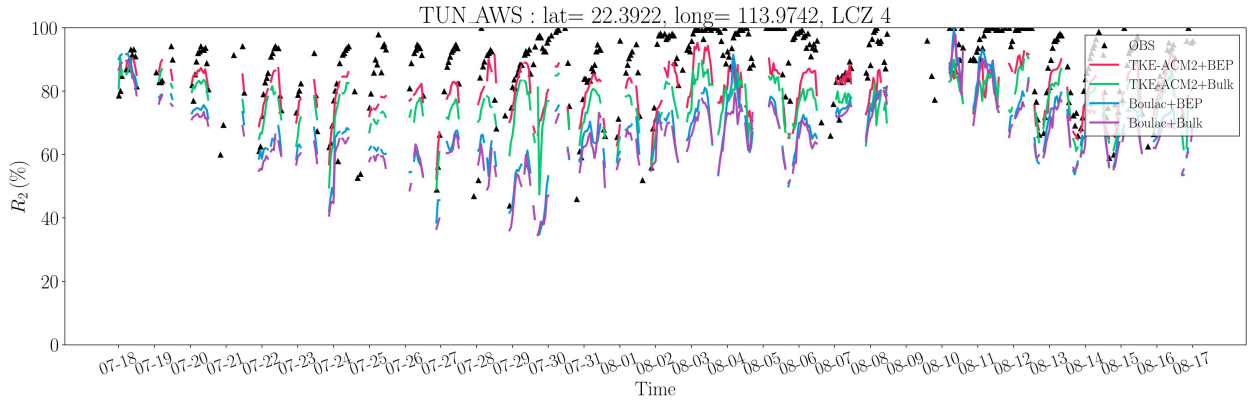

Figure S-97:  $SRH_2$  at TUN\_AWS station.

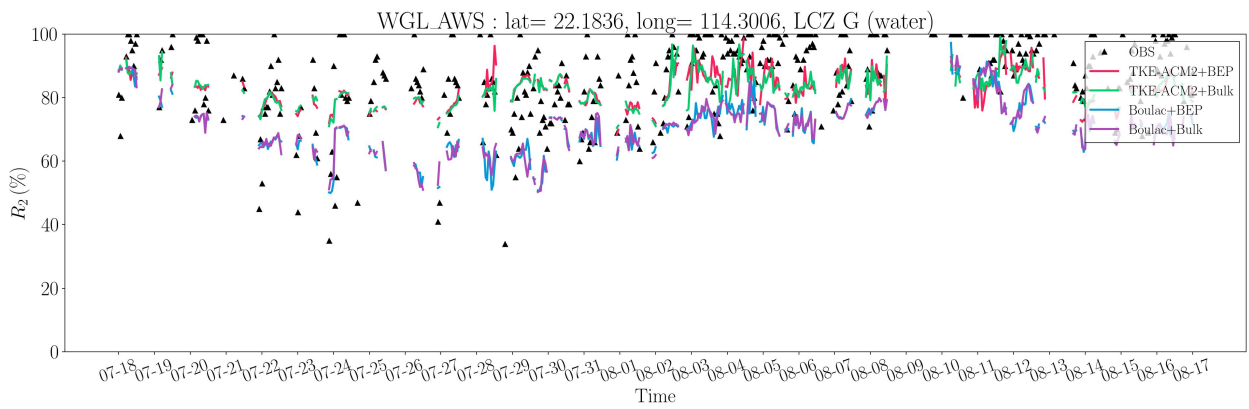

Figure S-98:  $SRH_2$  at WGL\_AWS station.
